# Lysine methylation shields an intracellular pathogen from ubiquitylation

**One Sentence Summary:** Lysine methylation blocks the ubiquitin attack

Patrik Engström<sup>1\*</sup>, Thomas P. Burke<sup>1</sup>, Anthony T. Iavarone<sup>2</sup>, Matthew D. Welch<sup>1\*</sup>

<sup>1</sup>Department of Molecular and Cell Biology, University of California, Berkeley, CA 94720, USA.

<sup>2</sup>QB3/Chemistry Mass Spectrometry Facility, University of California, Berkeley, CA 94720, USA.

\*Correspondence: [pengstrom@berkeley.edu](mailto:pengstrom@berkeley.edu) (P.E.), [welch@berkeley.edu](mailto:welch@berkeley.edu) (M.D.W)

1 **ABSTRACT**

2 Many intracellular pathogens stay invisible to the host detection machinery to promote  
3 their survival. However, it remains unknown how pathogen surfaces are disguised from host  
4 ubiquitin tagging, a first step in anti-microbial autophagy. We determined that outer membrane  
5 proteins (OMPs) of the intracellular bacterial pathogen *Rickettsia parkeri* are protected from  
6 ubiquitylation by protein-lysine methyltransferases (PKMTs) and the bacterial O-antigen. Analysis  
7 of the lysine-methylome revealed that PKMTs modify a subset of OMPs including surface protein  
8 OmpB. Mechanistically, methylation of lysines in OmpB camouflaged the same residues from  
9 ubiquitylation. Lysine methylation also prevented autophagy recognition and elimination by the  
10 autophagy factor ATG5 in macrophages and was critical for disease in mice. These findings  
11 suggest that lysine methylation shields proteins from ubiquitylation to evade autophagy targeting.

## 12 MAIN

13 Intracellular bacterial pathogens generally avoid the host immune surveillance machinery.  
14 This includes avoidance of surface targeting by the host ubiquitylation machinery and subsequent  
15 formation of a polyubiquitin coat, a first step in cell-autonomous immunity (1-5). The ubiquitin coat  
16 recruits autophagy receptors that engage with the autophagy machinery to target cytosol-exposed  
17 microbes for destruction (1, 4-8). Bacterial outer membrane proteins (OMPs) are targets for the  
18 host ubiquitylation machinery (9, 10), and the tick-borne obligate intracellular pathogen *Rickettsia*  
19 *parkeri* (*R. p.*) requires the abundant surface protein OmpB to protect OMPs from ubiquitylation  
20 (11). However, the detailed mechanisms that *R. p.* and other pathogens use to block lysine  
21 ubiquitylation of surface proteins, including OMPs, are unknown. We hypothesized that cell  
22 surface structures or modifications could provide protection at the molecular level. One such  
23 modification is lysine methylation, which is widespread in prokaryotes, archaea, and eukaryotes.  
24 This modification involves the transfer of one, two, or three methyl groups to the amino group of  
25 a lysine side chain, the same amino group that can also be modified by ubiquitin (12). Whether  
26 lysine methylation of bacterial surfaces prevents host detection and promotes intracellular survival  
27 has not been explored.

28 To identify bacteria-derived surface modifications that protect against ubiquitin coating,  
29 we screened pools of *R. p.* transposon mutants (13) (**Table S1**) for increased polyubiquitylation  
30 (pUb) relative to wild-type (WT) in Vero cells (an epithelial cell line commonly used to propagate  
31 and study intracellular pathogens) by immunofluorescence microscopy (**Fig. 1A**). We then  
32 analyzed individual mutants from pUb-positive pools and identified 4 mutants that were  
33 ubiquitylated, similar to *ompB* mutant bacteria (11) (**Fig. 1B, D, and E**). However, in contrast to  
34 the *ompB* mutant, these 4 strains expressed OmpB (**Fig. S1**). Two of the strains had insertions in  
35 the protein-lysine methyltransferase genes *pkmt1* and *pkmt2*, which are located at two distinct

36 chromosomal regions. The remaining two strains had insertions in the *wecA* and *rmID* genes,  
37 which are required for the biosynthesis of O-antigen (**Fig. S2**), a common surface structure in  
38 Gram-negative bacteria. As a control, we analyzed a strain with a mutation in the *mrda* gene,  
39 which is required for peptidoglycan biosynthesis and cell shape in other bacteria (14). This mutant  
40 strain had altered shape but was not polyubiquitylated (**Fig. 1B, D and E**), suggesting that not all  
41 bacterial cell envelope structures are required to avoid ubiquitylation. We also further quantified  
42 the pUb levels and observed that the *pkmt1::tn* bacteria had the highest levels (**Fig. 1E**). These  
43 data indicate that OmpB, PKMTs and the O-antigen protect *R. p.* from ubiquitylation.

44 The O-antigen was previously shown to be required for rickettsial pathogenesis (15), and  
45 OmpB was previously found to be required for *R. p.* to cause lethal disease in *lfnar<sup>-</sup>lfngr<sup>-</sup>* mice  
46 lacking the type I interferon receptor (IFNAR) and IFN- $\gamma$  receptor (IFNGR) (16). We therefore  
47 examined whether PKMT1 or PKMT2 are important for causing disease *in vivo* by infecting *lfnar<sup>-</sup>*  
48 *lfngr<sup>-</sup>* mice. We observed that mice succumbed to WT but not to *pkmt1::tn* or *pkmt2::tn* bacteria  
49 (**Fig. 1F**). Mice infected with the *pkmt1::tn* mutant showed no signs of disease, whereas mice  
50 infected with *pkmt2::tn* showed a transient loss in body weight (**Fig. S3**). This indicates that  
51 PKMT1 and PKMT2 are virulence factors that promote *R. p.* pathogenesis.

52 Because PKMT1 or PKMT2 had previously been shown to methylate OmpB *in vitro* (17-  
53 20), we next examined whether methylation and the O-antigen protect OmpB, or another  
54 abundant outer membrane protein OmpA (21), from ubiquitylation. First, Vero cells  
55 overexpressing 6xHis-tagged ubiquitin were infected with WT and the *ompB*, *pkmt1::tn*, *pkmt2::tn*,  
56 *wecA::tn*, and *rmID::tn* strains. 6xHis-tagged ubiquitin was recruited to the surface of all of the  
57 mutants, but not WT bacteria, as observed by immunofluorescence microscopy (**Fig. S4**). Then,  
58 6xHis-ubiquitylated proteins were affinity purified from infected cells, and OmpA and OmpB were  
59 detected by Western blotting. OmpA was shifted towards higher molecular weights in cells

60 infected with mutant, but not WT bacteria, indicating OmpA is ubiquitylated (**Fig. 2A**). Similarly, in  
61 comparison with WT, OmpB was also shifted towards higher as well as lower molecular weights  
62 in cells infected with the *pkmt1::tn* and *pkmt2::t* mutants, and to a lesser extent with the *wecA::tn*  
63 and *rmlD::tn* mutants, suggesting that OmpB is ubiquitylated (**Fig. 2A**). To confirm that  
64 methylation protects OmpB and OmpA from ubiquitylation on the bacterial surface, we performed  
65 pUb-enrichments of surface fractions from purified bacteria followed by Western blotting. This  
66 revealed that both OmpB and OmpA shifted towards higher molecular weights in the  
67 methyltransferase mutants but not in WT bacteria (**Fig. 2B**). These data demonstrate that  
68 methylation is critical to protect OMPs from ubiquitylation on the bacterial surface.

69       Based on our observation that methylation protects both OmpA and OmpB from  
70 ubiquitylation, we set out to determine how frequently, and to what extent, lysines of *R. p.* OMPs  
71 are methylated. Peptides with methylated lysines from whole WT bacteria were quantified using  
72 label-free liquid chromatography-mass spectrometry (LC-MS). We then analyzed lysine  
73 methylation frequency in abundant OMPs as well as other abundant *R. p.* proteins (**Table S2**).  
74 This analysis revealed that *R. p.* OmpB, OmpA, and surface cell antigen 2 (Sca2) proteins had  
75 the highest abundance of methylated peptides. Lysine methylation was also detected in the outer-  
76 membrane assembly protein BamA and in a predicted outer membrane protein porin  
77 (WP\_014410329.1; from here on referred to as OMP-porin) (**Fig. 3A** and **Table S3**). We next  
78 mapped both methylated and unmethylated lysines on the above-mentioned OMPs and found  
79 that more than 50% of lysines detected from OmpB and OmpA were methylated, and a significant  
80 fraction of lysines were also methylated in Sca2 (31%), OMP-porin (30%), and BamA (27%) (**Fig.**  
81 **3B** and **Fig. S5**). Thus, in *R. p.*, lysine methylation of OMPs is common.

82       To identify OMPs that are methylated by PKMT1 and PKMT2 during infection, we  
83 compared lysine methylation frequencies in WT with those of *pkmt1::tn* or *pkmt2::tn* mutant

84 bacteria using LC-MS. We found that monomethylation of OmpB, OmpA, the predicted OMP-  
85 porin, and another surface cell antigen protein Sca1 was reduced in *pkmt1::tn* compared to WT  
86 bacteria (**Fig. 3C** and **Fig. S6**). Dimethylation of rickettsial surface proteins was not reduced in  
87 the mutants (**Fig. S6**). Although trimethylation was rare and therefore difficult to analyze at the  
88 individual protein level (**Fig. S7**), OmpB had reduced trimethylation levels in both  
89 methyltransferase mutants (**Fig. 3C**). Notably, the frequency of unmethylated lysines in OmpB  
90 was specifically increased in *pkmt1::tn* bacteria (**Fig. 3C** and **Fig. S6**). Lysine methylation of five  
91 other surface proteins (Sca1, Sca2, BamA, LomR, and Pal-lipoprotein), and 21 of 23 abundant  
92 proteins with different predicted subcellular distributions, was not affected by mutations in the  
93 *pkmt1* or *pkmt2* genes (**Fig. S6**). These data indicate that the PKMTs are required for methylation  
94 of a subset of OMPs including OmpB.

95 To determine which OmpB residues are modified by PKMT1 and PKMT2 during *R. p.*  
96 infection, we analyzed the methylation frequency of individual lysines in the mutants compared to  
97 WT using LC-MS. We observed reduced monomethylation frequencies of OmpB K418, K623,  
98 K634, K902, K1061, K1294, and K1323 in *pkmt1::tn* bacteria compared with WT, and reduced  
99 trimethylation frequencies on K1061 and K388 in the *pkmt2::tn* strain (**Fig. 3D**). This indicates  
100 that several lysines in *R. p.* OmpB are methylated by PKMT1 and PKMT2 during infection.  
101 Although these data are consistent with previous biochemical results indicating that PKMT1  
102 monomethylates and PKMT2 trimethylates OmpB's lysines (17, 19), we find that total OmpB-  
103 methylation is unaffected in the *pkmt2::tn* mutant. This suggests that PKMT1 is the primary  
104 methyltransferase for *R. p.* OmpB and that it can compensate, at least partly, for a deficiency in  
105 PKMT2.

106 To test the hypothesis that methylation of specific lysines in OmpB shields the same  
107 residues from ubiquitylation, we performed pUb-enrichments of bacterial surface fractions

108 followed by LC-MS to quantify lysines with diglycine (diGly) remnants, a signature for ubiquitin  
109 after trypsin digestion. A prediction of this hypothesis is that individual lysines that are heavily  
110 methylated in OmpB of *Rickettsia* species (17) including WT *R. p.* (**Fig. 3D**) are targets for  
111 ubiquitylation in *pkmt1::tn* bacteria. We confirmed this hypothesis as OmpB K634 and K623 in  
112 *pkmt1::tn* exhibited 7 to 10000-fold increased ubiquitylation compared with WT bacteria (**Fig. 3E**,  
113 **F** and **Fig. S8; Table S4**). Furthermore, we observed a 13-fold increase in ubiquitylation of the  
114 OMP-porin in *pkmt1::tn* bacteria (**Table S4**), indicating that methylation also protects additional  
115 OMPs. However, in *pkmt2::tn*, differential OMP-ubiquitylation was below detection limits (**Fig. 3E**,  
116 **F** and **Fig. S8; Table S4**). Together, these data indicate that methylation of lysines in OMPs by  
117 PKMT1 camouflages the same residues from ubiquitylation.

118 Because polyubiquitylation promotes recruitment of the autophagy receptors  
119 p62/SQSTM1 and NDP52 (7, 8), we hypothesized that lysine methylation and the O-antigen  
120 shield OMPs from ubiquitylation to block recruitment of these proteins. Consistent with this  
121 hypothesis, we observed that the majority of *pkmt1::tn*, *pkmt2::tn*, O-antigen (*wecA::tn*, *rmID::tn*),  
122 as well as *ompB* mutant bacteria, co-localized with p62 and NDP52 by immunofluorescence  
123 microscopy (**Fig. S9**). These data demonstrate that PKMTs and the O-antigen protect *R. p.* from  
124 autophagy recognition.

125 Many pathogenic bacteria including *R. p.* grow in immune cells such as macrophages (11),  
126 despite the fact that microbial detection in such cells triggers anti-bacterial pathways. We  
127 therefore investigated whether PKMT1 or PKMT2 were required for evading autophagy targeting  
128 and bacterial growth in cultured bone-marrow-derived macrophages (BMDMs), as was observed  
129 for OmpB (11). BMDMs were generated from control mice and mice lacking the gene encoding  
130 for autophagy related 5 (ATG5), a protein required for optimal membrane envelopment around  
131 pathogens targeted by autophagy, and for their subsequent destruction (6). We observed that

132 *pkmt1::tn* mutant bacteria were unable to grow in control BMDMs (*Atg5<sup>flox/flox</sup>*), and that growth  
133 was rescued in *Atg5*-deficient BMDMs (*Atg5<sup>-/-</sup>*). Further, >91% of *pkmt1::tn* bacteria were labeled  
134 with both pUb and p62 in *Atg5*-deficient BMDMs (**Fig. 4A, B, C and D**), suggesting that detected  
135 bacteria are not restricted when the autophagy cascade is prevented. In contrast, the *pkmt2::tn*  
136 mutant was not grossly defective in growth compared with WT bacteria and 50% of the bacteria  
137 were labeled p62, irrespective of host genotype (**Fig. 4A, B, C and D**), consistent with less  
138 pronounced ubiquitylation phenotypes compared to *pkmt1::tn* bacteria. Altogether, these data  
139 indicate that methylation is required for *R. p.* growth in macrophages by avoiding autophagy  
140 targeting.

141 Our work reveals a molecular mechanism involving lysine methylation that camouflages  
142 bacterial surface proteins from host detection. In particular, we found that lysine methylation is  
143 essential for blocking ubiquitylation, a first step in cell-autonomous immunity (1-4). This highlights  
144 an intricate evolutionary arms race between pathogens and hosts and reveals a strategy that  
145 pathogens can adapt to counteract host responses. The lysine methyltransferases PKMT1 and  
146 PKMT2 are conserved between rickettsial species (**Fig. S10 and Fig. S11**) and contain a core  
147 Rossmann fold found in the broader superfamily of class I methyltransferases that exist in diverse  
148 organisms (12, 18). Thus, we propose that lysine methylation, and potentially other lysine  
149 modifications, could be used by pathogens, symbionts, and perhaps even in eukaryotic  
150 organelles, to prevent unwanted surface ubiquitylation and downstream consequences including  
151 elimination by autophagy. Further study of microbial surface modifications will continue to  
152 enhance our understanding of the pathogen-host interface and could ultimately lead to new  
153 therapeutic interventions to treat human diseases including those caused by infectious agents.



154 **REFERENCES AND NOTES**

- 155 1. F. Randow, R. J. Youle, Self and nonself: how autophagy targets mitochondria and  
156 bacteria. *Cell Host Microbe* **15**, 403-411 (2014).
- 157 2. A. J. Perrin, X. Jiang, C. L. Birmingham, N. S. So, J. H. Brumell, Recognition of bacteria  
158 in the cytosol of Mammalian cells by the ubiquitin system. *Curr Biol* **14**, 806-811 (2004).
- 159 3. S. J. L. van Wijk *et al.*, Linear ubiquitination of cytosolic *Salmonella* Typhimurium activates  
160 NF-kappaB and restricts bacterial proliferation. *Nat Microbiol* **2**, 17066 (2017).
- 161 4. J. Noad *et al.*, LUBAC-synthesized linear ubiquitin chains restrict cytosol-invading bacteria  
162 by activating autophagy and NF-kappaB. *Nat Microbiol* **2**, 17063 (2017).
- 163 5. E. D. Case *et al.*, The *Francisella* O-antigen mediates survival in the macrophage cytosol  
164 via autophagy avoidance. *Cell Microbiol* **16**, 862-877 (2014).
- 165 6. J. Huang, J. H. Brumell, Bacteria-autophagy interplay: a battle for survival. *Nat Rev*  
166 *Microbiol* **12**, 101-114 (2014).
- 167 7. Y. T. Zheng *et al.*, The adaptor protein p62/SQSTM1 targets invading bacteria to the  
168 autophagy pathway. *J Immunol* **183**, 5909-5916 (2009).
- 169 8. T. L. Thurston, G. Ryzhakov, S. Bloor, N. von Muhlinen, F. Randow, The TBK1 adaptor  
170 and autophagy receptor NDP52 restricts the proliferation of ubiquitin-coated bacteria. *Nat*  
171 *Immunol* **10**, 1215-1221 (2009).
- 172 9. E. Fiskin, T. Bionda, I. Dikic, C. Behrends, Global analysis of host and bacterial  
173 ubiquitinome in response to *Salmonella* Typhimurium infection. *Mol Cell* **62**, 967-981  
174 (2016).
- 175 10. M. Polajnar, M. S. Dietz, M. Heilemann, C. Behrends, Expanding the host cell  
176 ubiquitylation machinery targeting cytosolic *Salmonella*. *EMBO Rep* **18**, 1572-1585  
177 (2017).
- 178 11. P. Engström *et al.*, Evasion of autophagy mediated by *Rickettsia* surface protein OmpB is  
179 critical for virulence. *Nat Microbiol* **4**, 2538-2551 (2019).
- 180 12. S. Lanouette, V. Mongeon, D. Figeys, J. F. Couture, The functional diversity of protein  
181 lysine methylation. *Mol Syst Biol* **10**, 724 (2014).
- 182 13. R. L. Lamason, N. M. Kafai, M. D. Welch, A streamlined method for transposon  
183 mutagenesis of *Rickettsia parkeri* yields numerous mutations that impact infection. *PLoS*  
184 *One* **13**, e0197012 (2018).
- 185 14. B. G. Spratt, A. B. Pardee, Penicillin-binding proteins and cell shape in *E. coli*. *Nature* **254**,  
186 516-517 (1975).
- 187 15. H. K. Kim, R. Premaratna, D. M. Missiakas, O. Schneewind, *Rickettsia conorii* O antigen  
188 is the target of bactericidal Weil-Felix antibodies. *Proc Natl Acad Sci U S A* **116**, 19659-  
189 19664 (2019).
- 190 16. T. P. Burke *et al.*, Inflammasome-mediated antagonism of type I interferon enhances  
191 *Rickettsia* pathogenesis. *Nat Microbiol* **5**, 688-696 (2020).
- 192 17. D. C. H. Yang, A. H. Abeykoon, B. E. Choi, W. M. Ching, P. B. Chock, Outer membrane  
193 protein OmpB methylation may mediate bacterial virulence. *Trends Biochem Sci* **42**, 936-  
194 945 (2017).
- 195 18. A. H. Abeykoon *et al.*, Structural insights into substrate recognition and catalysis in outer  
196 membrane protein B (OmpB) by protein-lysine methyltransferases from *Rickettsia*. *J Biol*  
197 *Chem* **291**, 19962-19974 (2016).
- 198 19. A. Abeykoon *et al.*, Multimethylation of *Rickettsia* OmpB catalyzed by lysine  
199 methyltransferases. *J Biol Chem* **289**, 7691-7701 (2014).
- 200 20. A. H. Abeykoon *et al.*, Two protein lysine methyltransferases methylate outer membrane  
201 protein B from *Rickettsia*. *J Bacteriol* **194**, 6410-6418 (2012).

- 202 21. N. F. Noriea, T. R. Clark, T. Hackstadt, Targeted knockout of the *Rickettsia rickettsii* OmpA  
203 surface antigen does not diminish virulence in a mammalian model system. *mBio* **6**,  
204 (2015).
- 205 22. R. L. Lamason *et al.*, *Rickettsia* Sca4 Reduces Vinculin-Mediated Intercellular Tension to  
206 Promote Spread. *Cell* **167**, 670-683 e610 (2016).
- 207 23. U. Distler *et al.*, Drift time-specific collision energies enable deep-coverage data-  
208 independent acquisition proteomics. *Nat Methods* **11**, 167-170 (2014).
- 209 24. R. S. Plumb *et al.*, UPLC/MS(E); a new approach for generating molecular fragment  
210 information for biomarker structure elucidation. *Rapid Commun Mass Spectrom* **20**, 1989-  
211 1994 (2006).
- 212 25. P. V. Shliaha, N. J. Bond, L. Gatto, K. S. Lilley, Effects of traveling wave ion mobility  
213 separation on data independent acquisition in proteomics studies. *J Proteome Res* **12**,  
214 2323-2339 (2013).
- 215 26. S. Nahnsen, C. Bielow, K. Reinert, O. Kohlbacher, Tools for label-free peptide  
216 quantification. *Mol Cell Proteomics* **12**, 549-556 (2013).
- 217 27. K. A. Neilson *et al.*, Less label, more free: approaches in label-free quantitative mass  
218 spectrometry. *Proteomics* **11**, 535-553 (2011).
- 219 28. C. I. Carlström *et al.*, (Per)chlorate-reducing bacteria can utilize aerobic and anaerobic  
220 pathways of aromatic degradation with (per)chlorate as an electron acceptor. *mBio* **6**,  
221 (2015).

222

## 223 **ACKNOWLEDGEMENTS**

224           We thank Dr. Hwan Kim (Stony Brook University) for kindly providing the O-antigen  
225 antibody and for fruitful discussions. We are also grateful for the *Atg5<sup>flox/flox</sup>* and *Atg5<sup>-/-</sup>* BMDMs  
226 provided by Dr. G. Golovkine, a member of the laboratory of Prof. Jeffery S. Cox (UC Berkeley),  
227 and Prof. Michael Rape at UC Berkeley for fruitful discussions. **Funding:** P.E. was supported by  
228 a postdoctoral fellowship from the Sweden-America Foundation. M.D.W. was supported by  
229 NIH/NIAID grants R01 AI109044 and R21 AI109270. A mass spectrometer used in this study was  
230 purchased with support from the NIH (grant 1S10 OD020062-01). **Author contributions:** P.E.  
231 conceived the study with the assistance of M.D.W. P.E. performed laboratory work and analysis,  
232 except for mass spectrometry, which was conducted together with A.T.I, and animal experiments,  
233 which were conducted by T.P.B. P.E. drafted the initial manuscript, and A.T.I, T.P.B, and M.W.D  
234 provided editorial feedback. **Data and materials availability:** All data used in the analysis are  
235 provided in the main text or supplementary materials. Materials are available upon request.

236 FIGURES

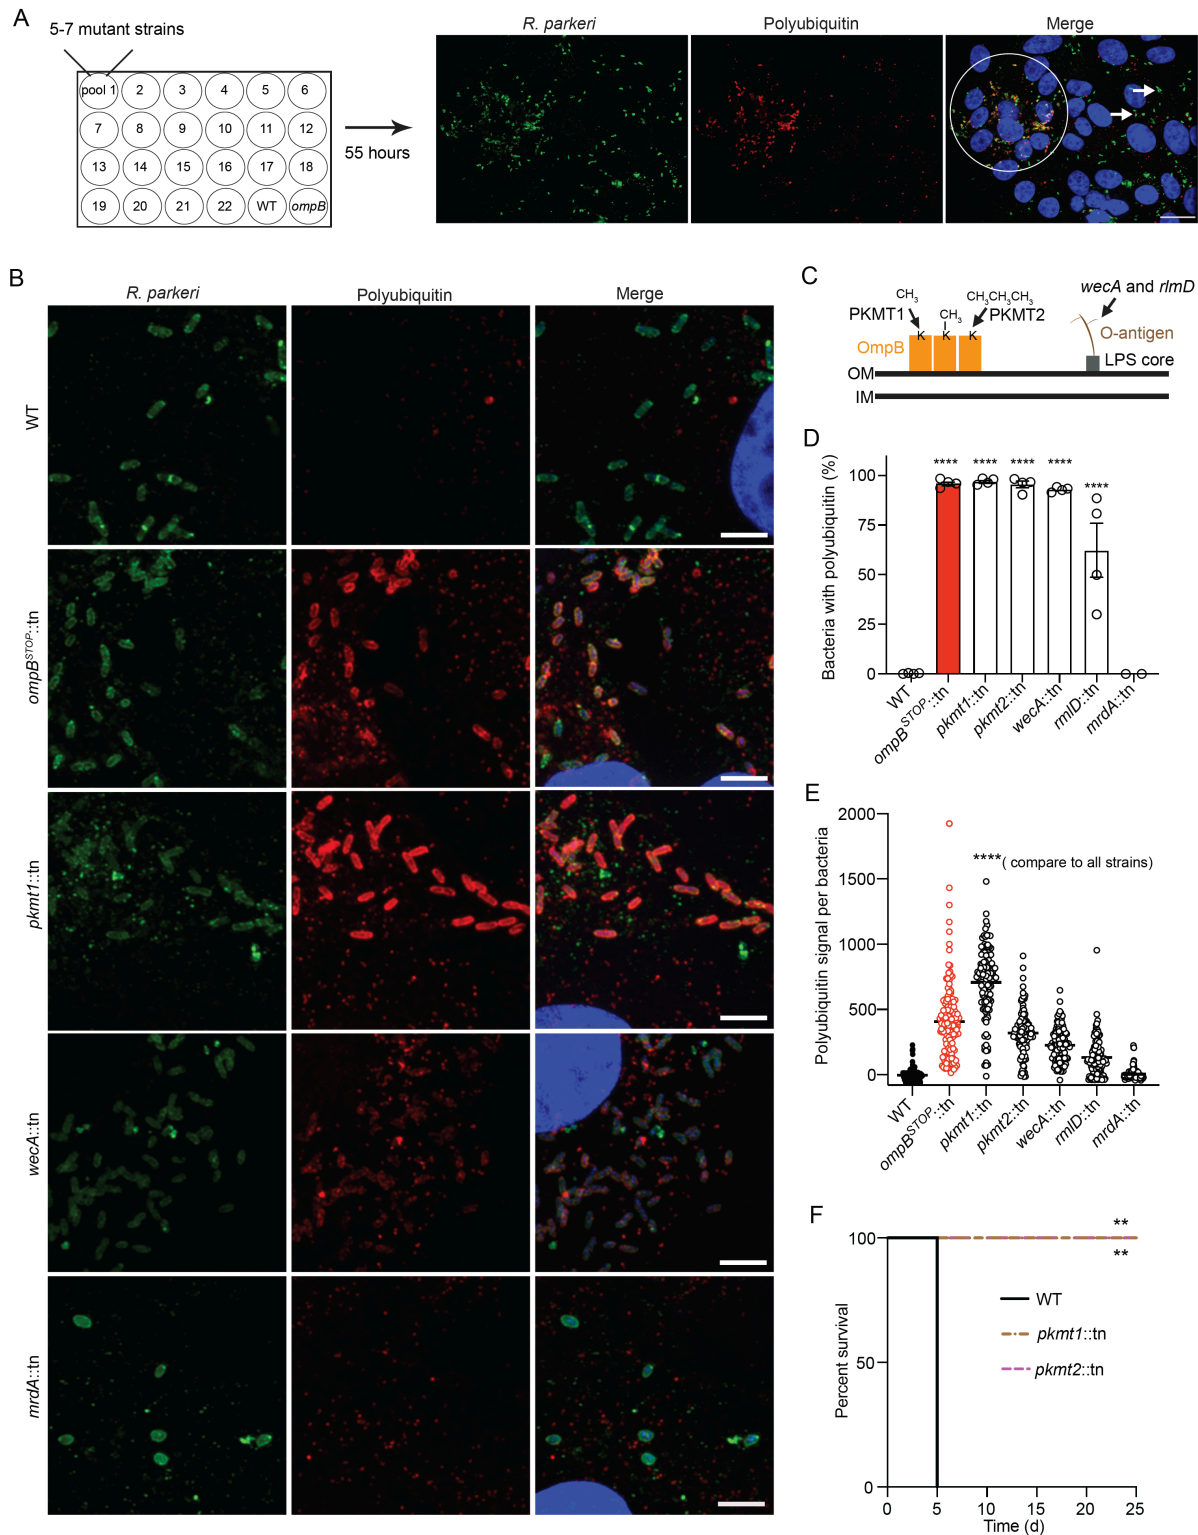

237  
238  
239

**Figure 1. The O-antigen and lysine methylation are virulence factors that protect *R. p.* from ubiquitylation. (A)** Pools of *R. p.* (green) mutants screened for increased pUb (red) via

240 immunofluorescence microscopy. DNA, blue. *ompB* mutant (11), positive control; WT, negative  
241 control. White circle, pUb-positive bacteria; arrows pUb-negative bacteria. Scale bar, 20  $\mu\text{m}$ . **(B)**  
242 Vero cells infected with bacterial strains at 72 hours post-infection (h.p.i.) stained as in **A**. Scale  
243 bar, 5  $\mu\text{m}$  (representative of  $n = 4$ ). **(C)** A schematic of biological function of the genes identified  
244 in **A** and **B**. **(D)** Percentage of bacteria co-localized with pUb at 72 h.p.i. Data are the mean  $\pm$   
245 s.e.m.;  $n = 4$  (WT, *ompB*<sup>STOP</sup>::tn, *pkmt1*::tn, *pkmt2*::tn, *wecA*::tn, and *rmlD*::tn) and 2 for *mrdA*::tn;  
246  $\geq 108$  bacteria were counted for each infection. Statistical comparisons between WT and mutants  
247 were performed using a one-way ANOVA with Dunnett's post-hoc test; \*\*\*\*  $P < 0.0001$ . **(E)** pUb  
248 signal per bacteria as determined from micrographs. Lines indicate the means;  $n = 3$  fields of  
249 vision;  $\geq 35$  bacteria per field of vision were analyzed, totaling  $\geq 122$  bacteria. Statistical  
250 comparisons were performed using a Kruskal-Wallis test with Dunn's post-hoc test; \*\*\*\*  $P <$   
251  $0.0001$ . **(F)** Survival of *lfnar*<sup>-/-</sup>*lfng*<sup>-/-</sup> mice intravenously infected with  $5 \times 10^6$  WT, *pkmt1*::tn, or  
252 *pkmt2*::tn bacteria ( $n = 5$  mice, WT;  $n = 6$  mice, *pkmt1*::tn and *pkmt2*::tn, combined from two  
253 independent experiments. Statistical comparison between WT and mutants was performed using  
254 a two-way ANOVA and a Log-rank (Mantel-Cox) test; \*\*  $P < 0.01$ ).

255

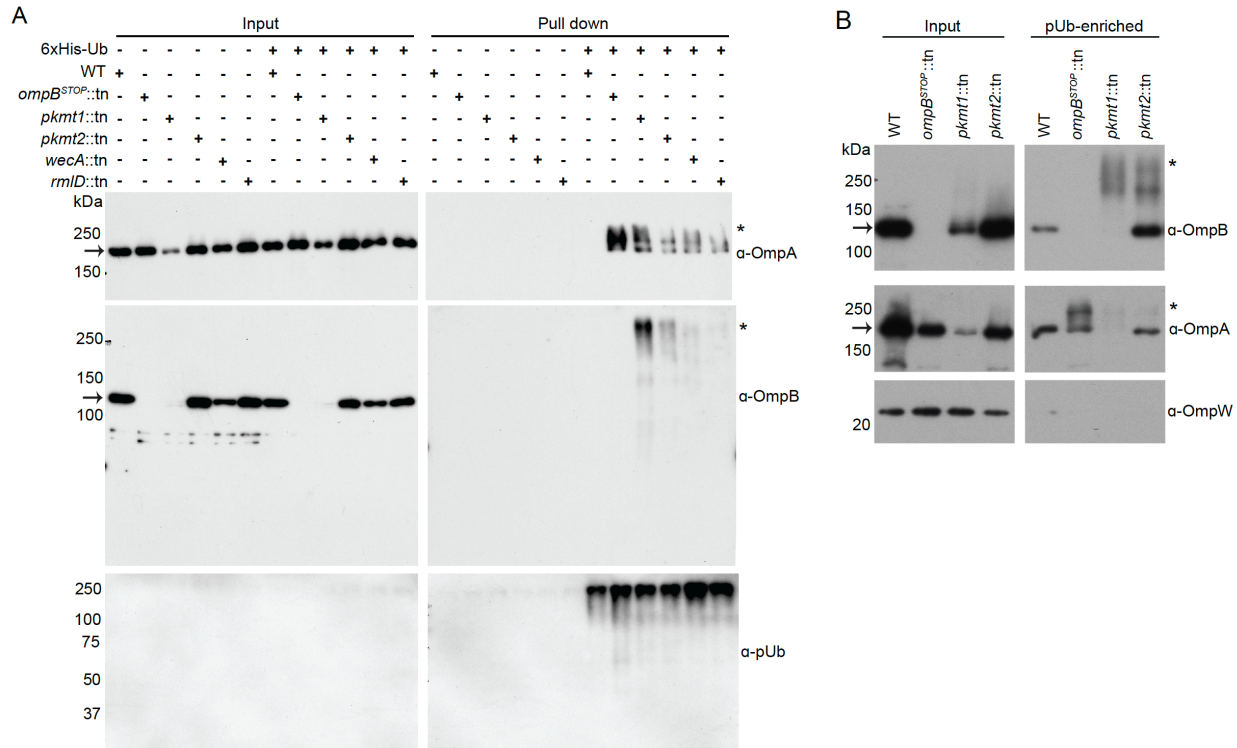

256

257

258

259

260

261

262

263

264

**Figure 2. Lysine methylation and the O-antigen protect OMPs from ubiquitylation. (A)** Western blot of His-Ub input and pull-down samples from infected control and 6xHis-ubiquitin expressing cells, probed for OmpB, OmpA, and pUb (representative of  $n = 3$ ). **(B)** pUb-enriched (TUBE-1, pan specific) samples from purified bacteria probed for OmpB, OmpA, pUb, and OmpW (OmpB and OmpA of endogenous molecular weight represent non-specific binding to TUBE-1 beads) (representative of  $n = 3$ ). Asterisks indicate OmpB and OmpA that exhibit increased molecular weight, indicating ubiquitylation. Arrows indicate OmpB and OmpA of endogenous molecular weight.



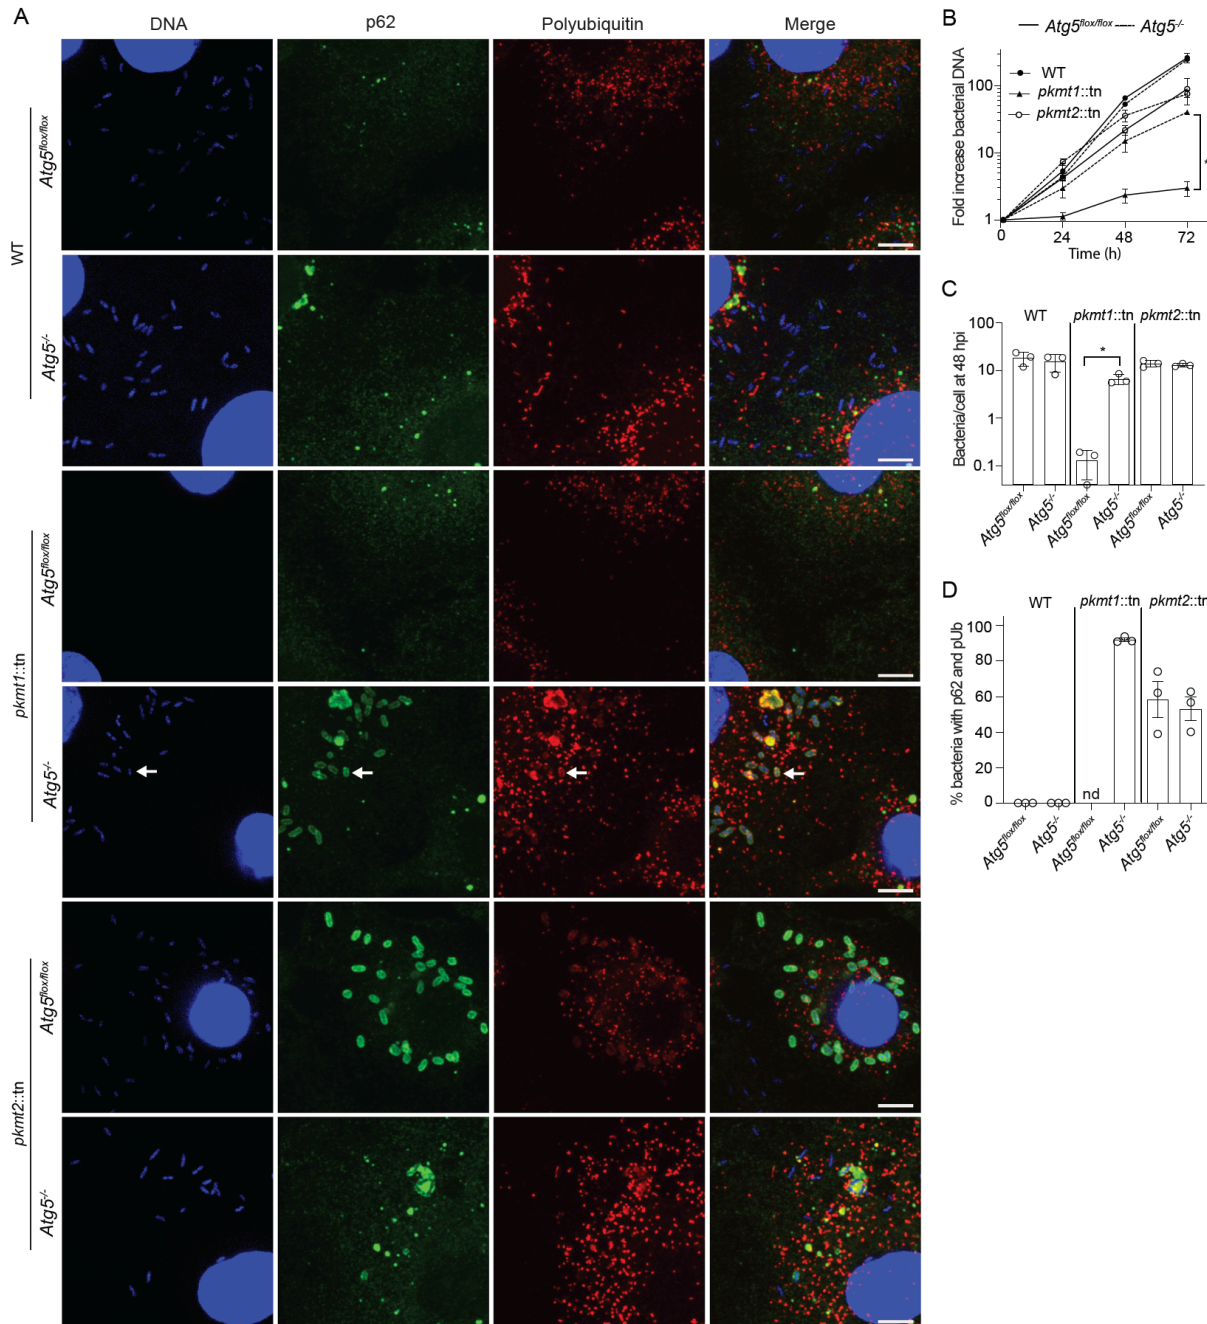

280

281 **Figure 4. Methylation prevents ATG5-dependent *R. p.* killing in macrophages. (A)**

282 Micrographs of infected control (*Atg5<sup>fllox/fllox</sup>*) and *Atg5*-deficient (*Atg5<sup>-/-</sup>*) BMDMs at 48 h.p.i., stained

283 for DNA (blue), pUb (red), and p62 (green). Arrow indicate a bacterium positive for both pUb and

284 p62. Scale bars, 5  $\mu$ m ( $n = 3$ ). (B) Growth curves of WT, *pkmt1::tn*, and *pkmt2::tn* bacteria in

285 control and *Atg5<sup>-/-</sup>* BMDMs, as measured by genomic equivalents using qPCR ( $n = 3$ ). (C)

286 Quantification of the mean number of bacteria per cell ( $n = 3$ ). (D) Quantification of the percentage

287 of bacteria with p62 and pUb ( $n = 3$ ). nd, not determined. Data are the mean  $\pm$  s.e.m. Statistical

288 comparisons in B and C were performed using a Brown-Forsyth and Welch ANOVA with

289 Dunnett's post-hoc test; \*,  $P < 0.05$ .



290 **SUPPLEMENTARY MATERIAL FIGURE**

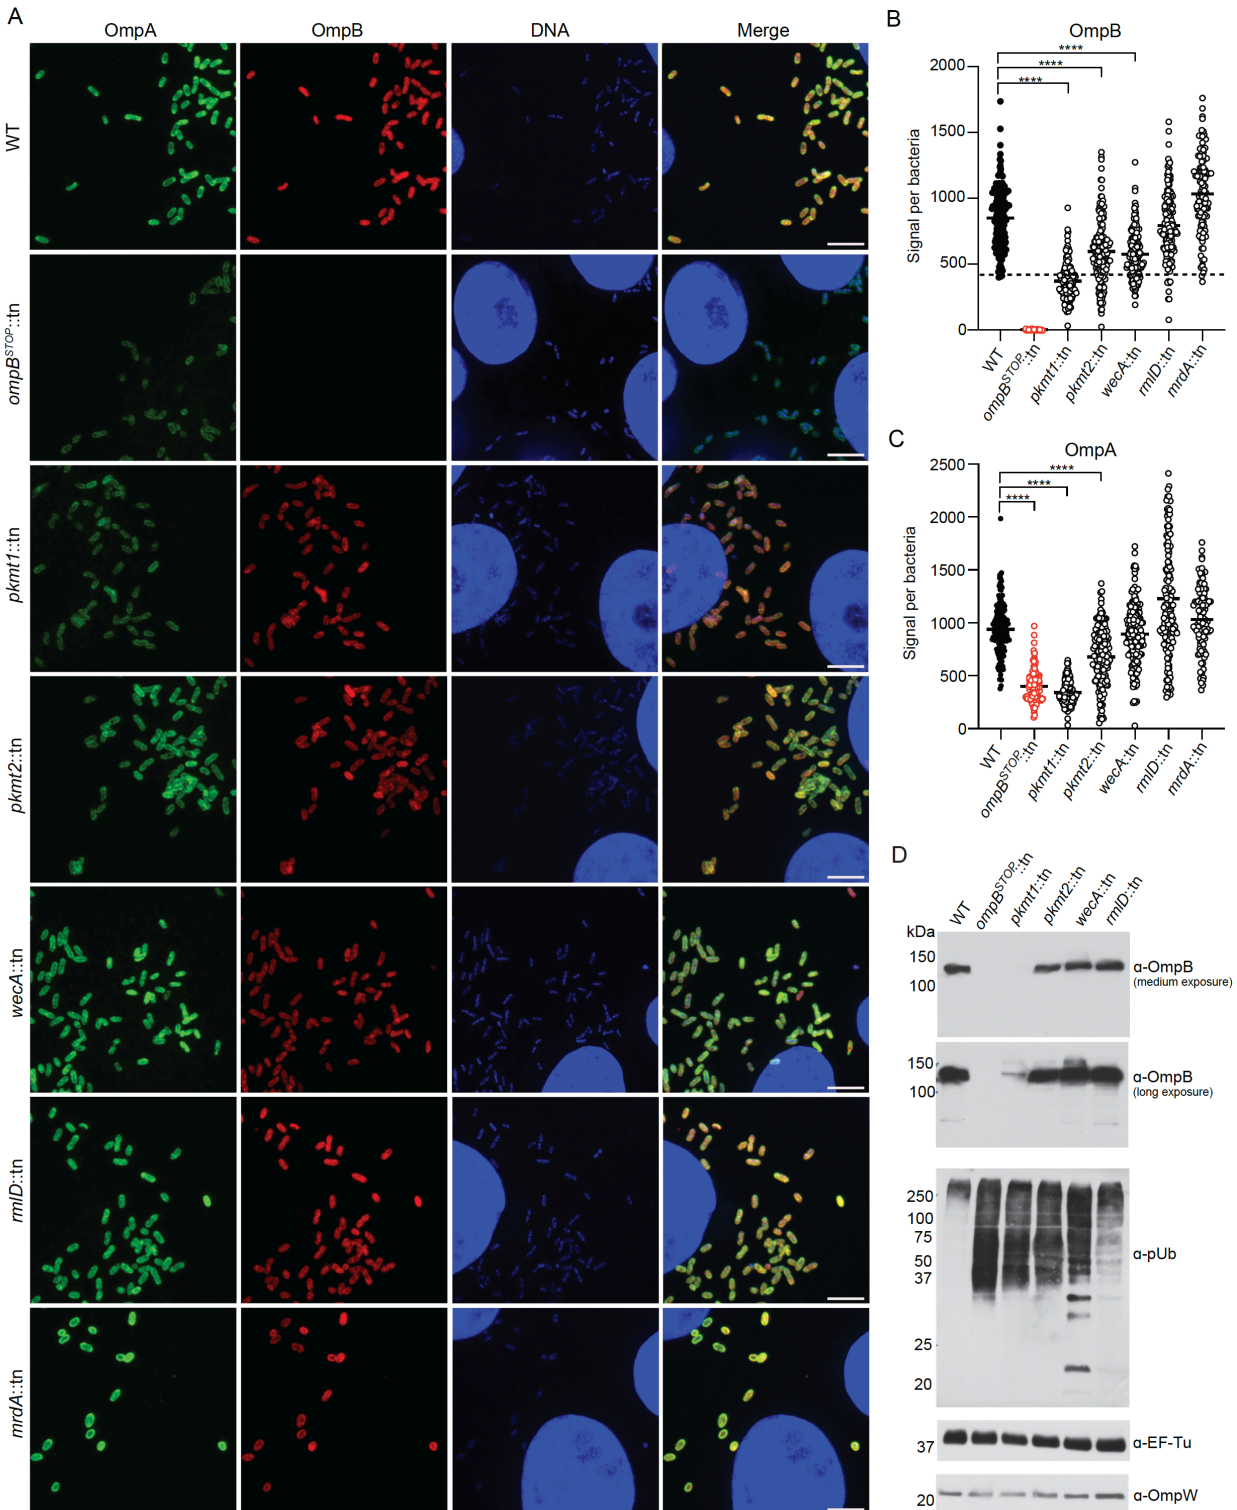

291 **Figure S1. Polyubiquitylated mutant *R. p.* strains are positive for OmpA and OmpB. (A)**  
 292 Micrographs of Vero cells infected with the indicated strains stained for OmpA (green, 13-3  
 293 antibody), OmpB (red, OmpB-antibody), and DNA (blue, Hoechst) at 72 h.p.i. (representative of  
 294

295  $n = 3$ ). Scale bar 5  $\mu\text{m}$ . **(B)** Quantification of OmpB signal per bacteria. Lines indicate the means;  
296  $n = 3$  fields of vision;  $\geq 50$  bacteria per field of vision were analyzed. Statistical comparisons were  
297 performed using a Kruskal-Wallis test with Dunn's post-hoc test; \*\*\*\*  $P < 0.0001$  between  
298 indicated strains. Dashed line indicates that the majority of mutant bacterial populations, except  
299 *pkmt1::tn* bacteria, have OmpB levels comparable to WT bacteria. **(C)** Quantification of OmpA  
300 signal per bacteria as in **B**. **(D)** Western blot of  $5 \times 10^6$  purified bacteria probed for OmpB, pUb,  
301 OmpW and EF-Tu (bacterial loading controls) (representative of  $n = 2$ ).

302

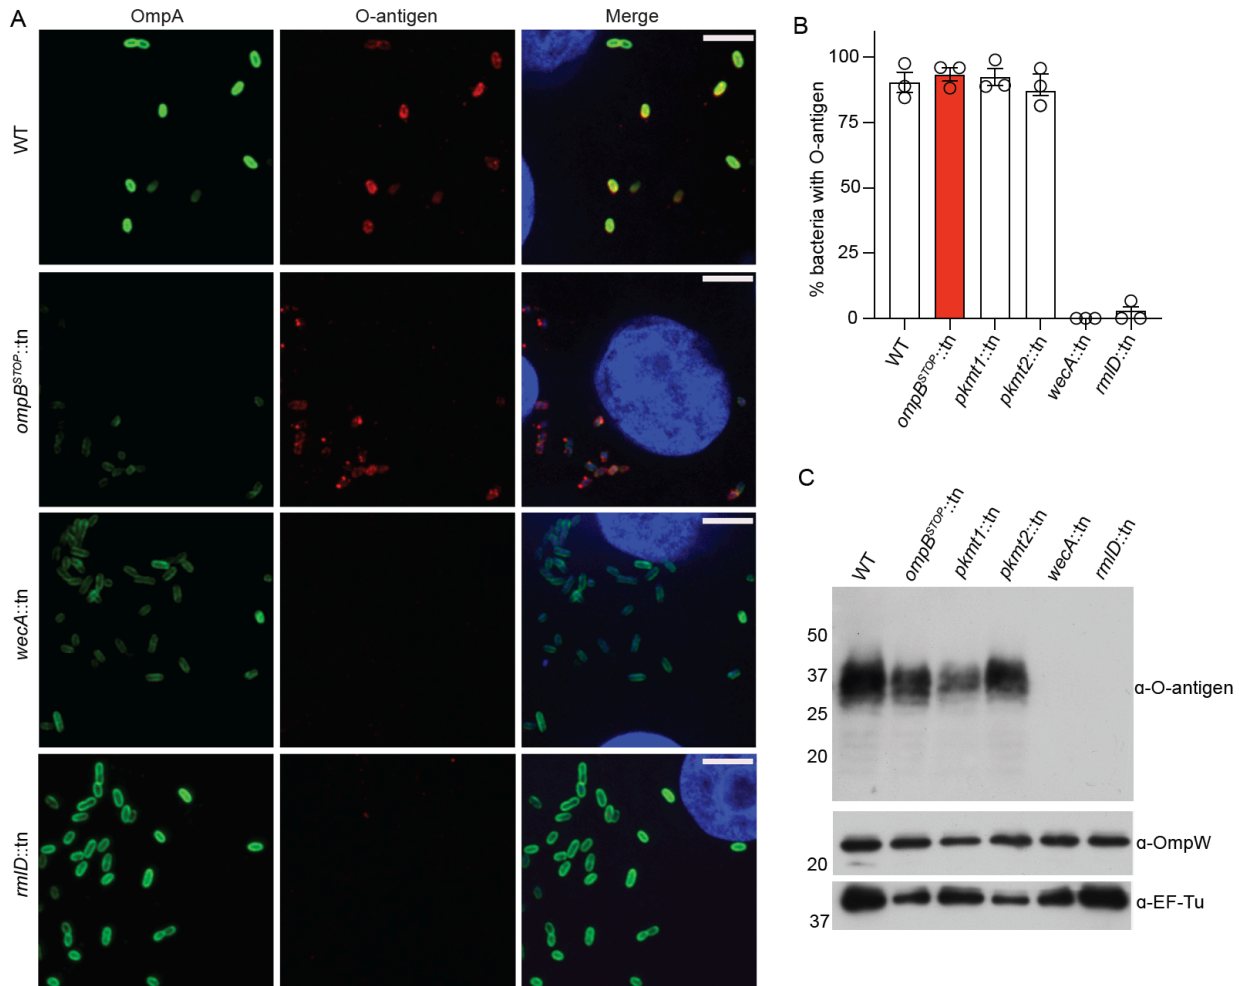

303

304

305

306

307

308

309

310

**Figure S2. The *wecA::tn* and *rmlD::tn* bacteria lack the O-antigen.** (A) Micrographs of Vero cells infected with the indicated strains stained for OmpA (green, 13-3 antibody), the O-antigen (red, O-antigen antibody(15)) and DNA (blue, Hoechst) at 72 h.p.i. (representative of  $n = 3$ ). Scale bars, 5  $\mu\text{m}$ . (B) Percentage of bacteria positive for the O-antigen at 72 h.p.i.  $n = 2$ ;  $\geq 90$  bacteria were counted in each infection (data are the mean  $\pm$  s.e.m.;  $n = 3$ ). (C) Western blot of  $5 \times 10^6$  purified WT and mutant bacteria probed for the O-antigen. OmpW and EF-Tu were used as bacterial loading controls (representative of  $n = 3$ ).

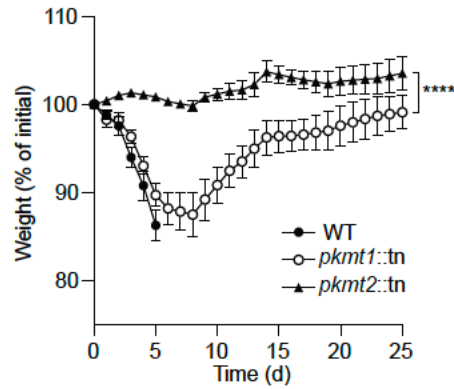

311  
312 **Figure S3. PKMT1 plays a more significant role in causing disease *in vivo* compared to**  
313 **PKMT2. (A)** Weight changes of *Ifnar<sup>-/-</sup>Ifngr<sup>-/-</sup>* mice intravenous infected with  $5 \times 10^6$  WT, *pkmt1::tn*,  
314 or *pkmt2::tn* bacteria (data are the mean  $\pm$  s.e.m.  $n = 5$ , WT;  $n = 6$ , *pkmt1::tn* and *pkmt2::tn*,  
315 combined from two independent experiments). A two-way ANOVA from 0 to 25 days post-  
316 infection (d.p.i.) was used to statistically compare the weight changes between the *pkmt1::tn* and  
317 *pkmt2::tn* mutants. \*\*\*\*  $P < 0.0001$ .

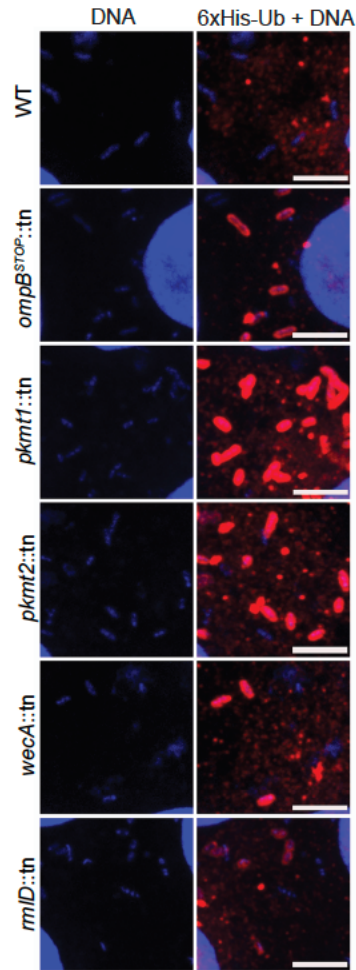

318

319 **Figure S4. 6xHis-ubiquitin is recruited to the surface of mutant *R. p.*** Micrographs of infected  
320 Vero cells expressing 6xHis-ubiquitin stained with anti-His antibody (red) and Hoechst (blue,  
321 bacterial and host DNA), at 28 h.p.i. Scale bar, 5  $\mu$ m (representative of  $n = 2$ ).

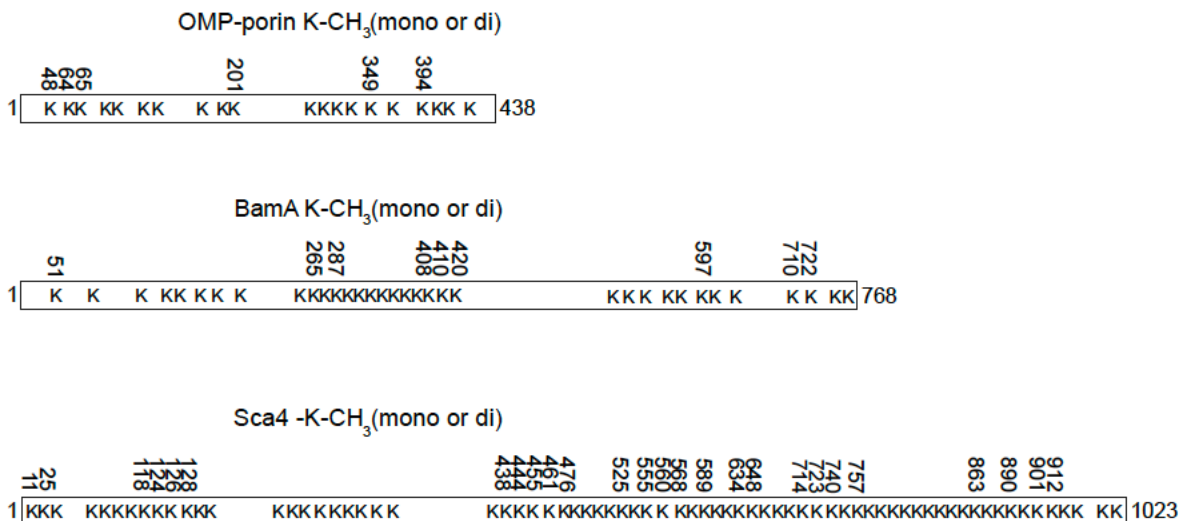

322  
 323 **Figure S5. Lysine-methylome reveals that *R. p.* OMP-porin, BamA, and the released factor**  
 324 **Sca4 are methylated.** Methylated lysines are indicated with residue number, and unmethylated  
 325 residues without, determined by LC-MS as in **Fig. 3B** (data is combined from five independent  
 326 experiments). See also Table S2.

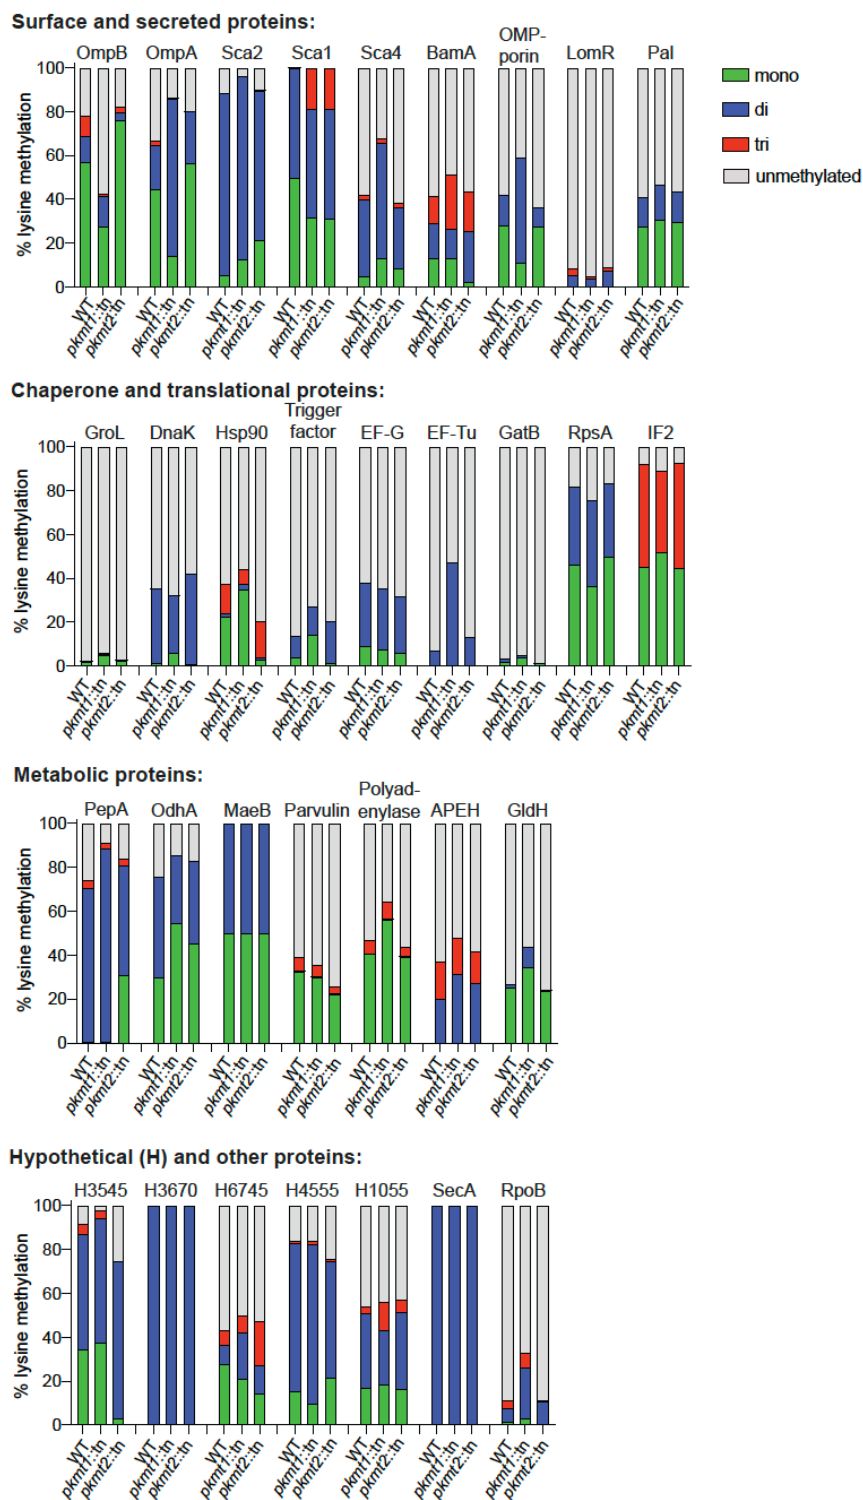

327  
 328 **Figure S6. PKMT1 primarily modifies bacterial OMPs.** Percentage of total abundances of the  
 329 lysines methylated in WT, that is unmethylated, mono-, di-, or tri-methylated in respective strain.  
 330 Proteins with  $\geq 3$  lysines methylated detected in independent experiments are shown (mean of  $n$   
 331 = 2, performed in technical triplicates). OmpB, OmpA and Sca2 data are the same as in Fig. 3C.  
 332 See also Table S2.

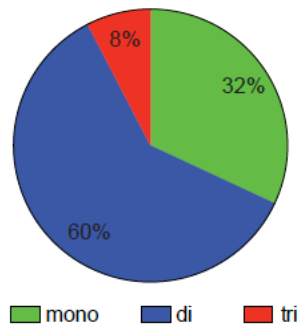

333

334 **Figure S7. Dimethylation is a common methylation state among the abundant *R. p.***

335 **proteins.** Percentage of total lysines abundances detected to as mono-, di-, or tri-methylated in

336 WT bacteria of the proteins indicated in Table S2 (mean of  $n = 2$ , performed in technical

337 triplicates).



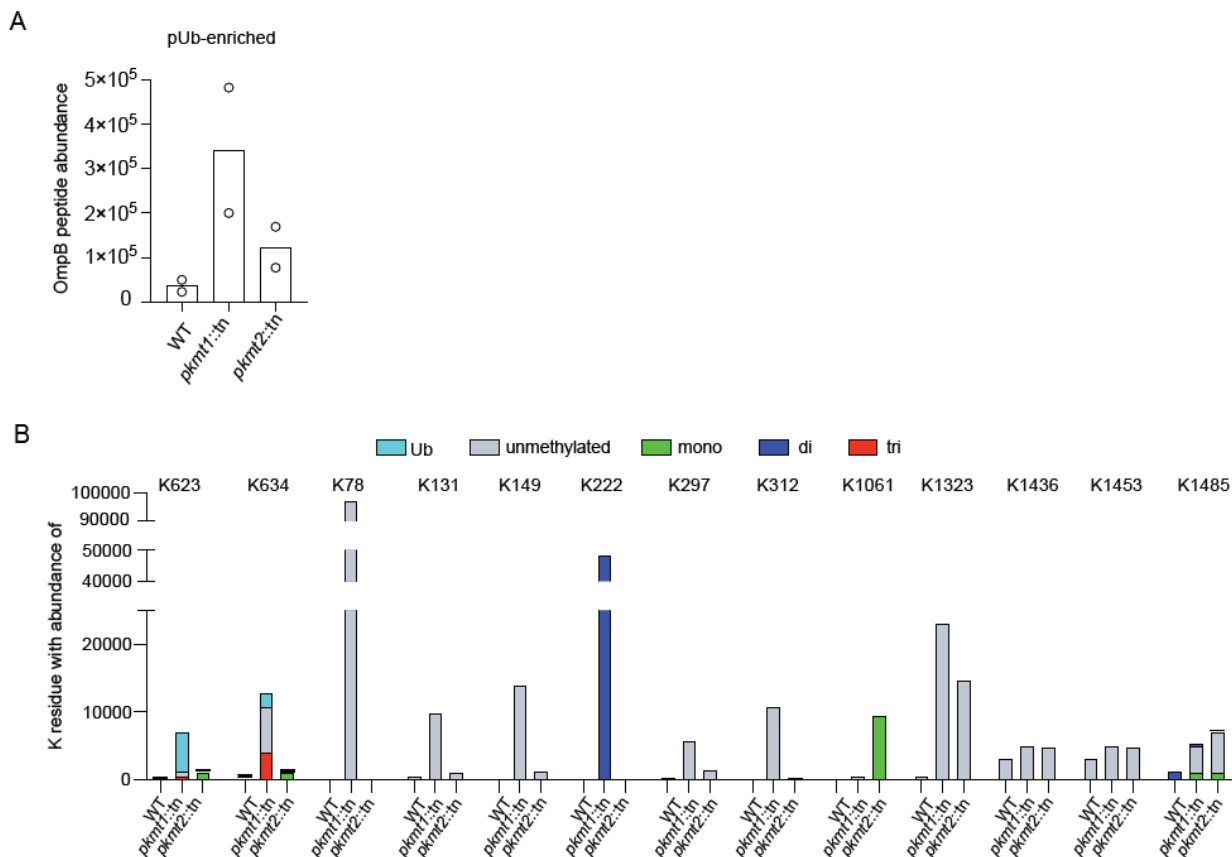

338  
 339 **Figure S8. K623 and K634 are frequently ubiquitylated when PKMT1-mediated methylation**  
 340 **is reduced.** (A) OmpB peptide abundance values after pUb-enrichments from respective strain,  
 341 as determined by LC-MS (data are mean of  $n = 2$ , performed in triplicates). (B) Abundance values  
 342 of lysines in OmpB that are ubiquitylated, unmethylated, mono-, di-, or tri-methylated, in  
 343 respective strain after pUb-enrichments as in **Fig 3G**. Only residues detected in independent  
 344 experiments are shown (data are the mean of  $n = 2$ , performed in technical triplicates). K623 data  
 345 in **B** are the same as in **Fig. 3F**.

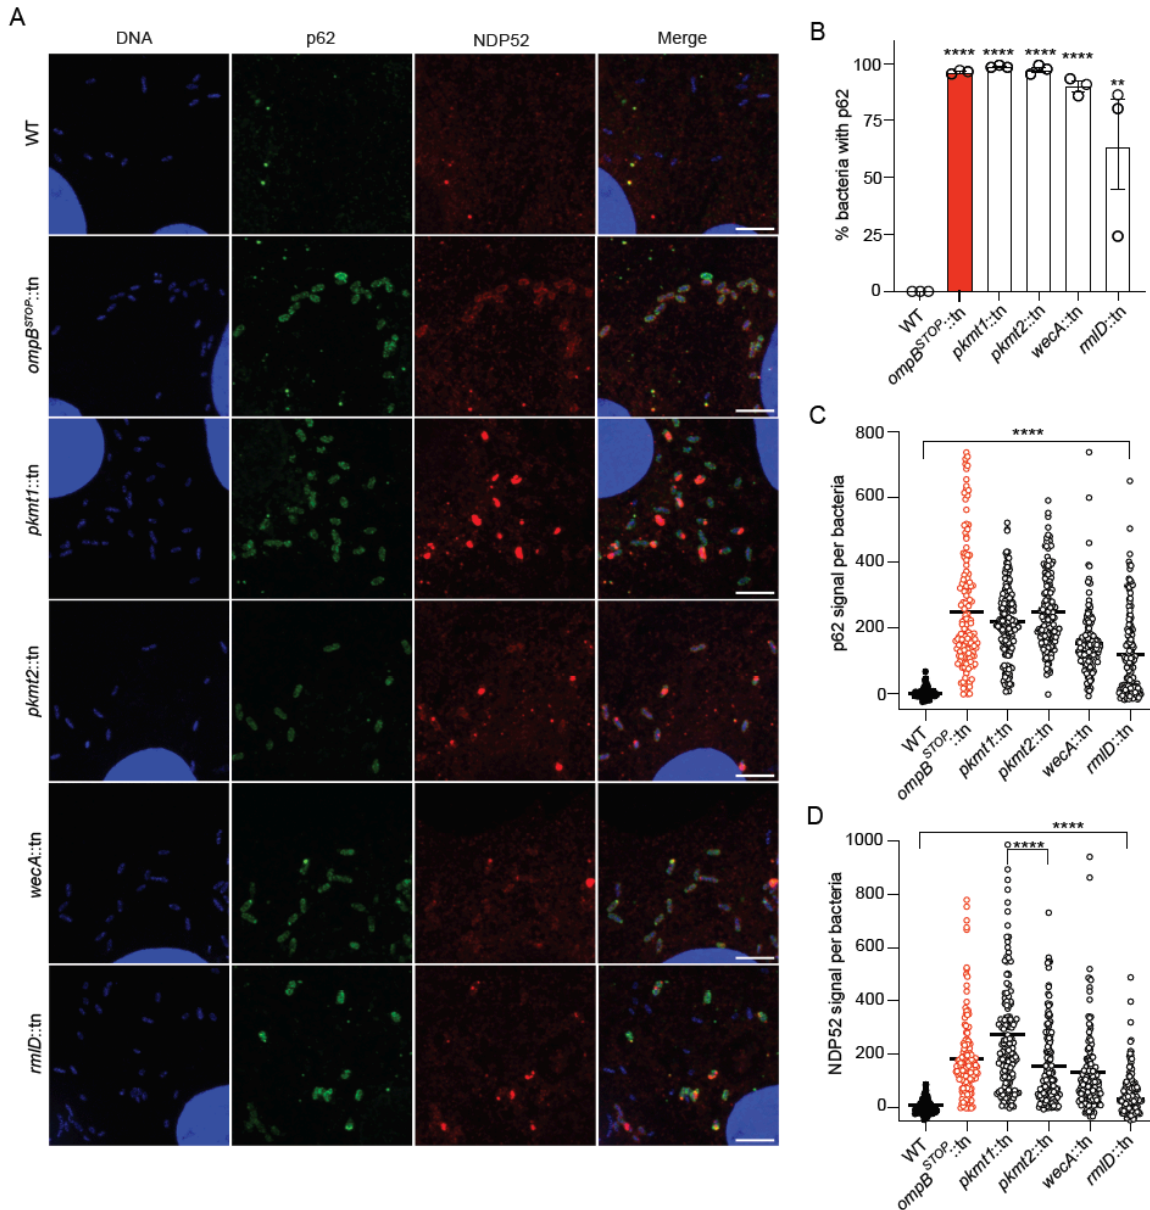

346

347

348

349

350

351

352

353

354

355

356

357

358

**Figure S9. OmpB, methylation, and the O-antigen block recruitment of autophagy receptors to *R. p.*** (A) Micrographs of Vero cells infected with the indicated strains: stained for bacterial and host DNA (blue, Hoechst), p62 (green, p62-antibody), and NDP52 (red, NDP52-antibody) at 72 h.p.i ( $n = 4$  for p62 staining;  $n = 2$  for NDP52 staining). (B) Percentage of bacteria that show rim-like surface localization of p62 at 72 h.p.i. Data are the mean  $\pm$  s.e.m.;  $n = 3$ ;  $\geq 142$  bacteria were counted for each infection. Statistical comparisons between WT and *ompB<sup>STOP</sup>::tn*, *pkmt1::tn*, *pkmt2::tn*, *wecA::tn*, *rmlD::tn* were performed using a one-way ANOVA with Tukey's post-hoc test; \*\*\*\*  $P < 0.0001$ . (C) Quantification of p62 signal per bacteria from a representative experiment. Lines indicate the means. ( $n = 3$  fields of vision;  $\geq 50$  bacteria per field of vision were analyzed). Statistical comparisons were performed using a Kruskal-Wallis test with Dunn's post-hoc test; \*\*\*\*  $P < 0.0001$  between indicated strains. (D) Quantification of NDP52 signal per bacteria as in C.

|                                                             |     |                                                                                                                         |     |
|-------------------------------------------------------------|-----|-------------------------------------------------------------------------------------------------------------------------|-----|
| <i>Rickettsia parkeri</i>                                   | 1   | MSPKVTNSSTPN <del>GHDKMAKKT</del> THSAQSVVN--GAVSDHNTYDEIPYESYPYAL <del>TNPYHLSTLATL</del> FGVNAPEVNAKILE               | 78  |
| <i>Rickettsia rickettsii</i>                                | 1   | MSPKATNSSTPN <del>GHDKMAKKT</del> THSAQSVVN--GAVSDHNTYDEIPYESYPYAL <del>TNPYHLSTLATL</del> FGVNAPEVNAKILE               | 78  |
| <i>Rickettsia conorii</i>                                   | 1   | MSPKATNSSTPN <del>GHDKMAKKT</del> THSAQSVVN--GAVLDHNTYDEIPYESYPYAL <del>TNPYHLSTLATL</del> FGVNAPEVNAKILE               | 78  |
| <i>Rickettsia typhi</i>                                     | 1   | MSLKSST---TNDHDK-TTKINSIQSLV <del>ct</del> DTVADHNTYDEIPYESYPYAIT <del>NPYHLSTLATL</del> FGVNAPEVNSKILE                 | 75  |
| <i>Rickettsia prowazeki</i>                                 | 1   | MSLKSTTSSLTNNHDK-T--INSVQSLV <del>gt</del> GTVADHNPYDEVPPYESYPYAIT <del>NPYHLSTLATL</del> FGVNAPEVNSKILE                | 77  |
| <i>Rickettsia bellii</i>                                    | 1   | MSAKASNSNLPNGHDKT <del>TKEK</del> HNTQPVIN--GAIK-HNTYDEVPPYESYPYF <del>TNPYHLSTLATL</del> FGVDAPNVETAKILE               | 77  |
| <i>Rickettsia endosymbiont of Proechinophthirus fluctus</i> | 1   | MSPKATNSSTPN <del>SHDKMAKKT</del> THSVQSVVN--SAVSDHNTYDEIPYESYPYAF <del>TNPYHLSTLATL</del> FGVNAPEVNAKILE               | 78  |
| <i>Rickettsia parkeri</i>                                   | 79  | LGCAAGGNLIPHAVLYPKAYFVGV <del>DLSKVQ</del> IDEANKNVKALGLKNIEFHHC <del>SITD</del> INDSFGKFDYIICHGVI <del>SWVPK</del> TVR | 158 |
| <i>Rickettsia rickettsii</i>                                | 79  | LGCAAGGNLIPHAVLYPKAYFVGV <del>DLSKVQ</del> IDEANKNVKALGLKNIEFHHC <del>SITD</del> INDSFGKFDYIICHGVI <del>SWVPK</del> TVR | 158 |
| <i>Rickettsia conorii</i>                                   | 79  | LGCAAGGNLIPHAVLYPKAYFVGV <del>DLSKVQ</del> IDEANKNVKALGLKNIEFHHC <del>SITD</del> INDSFGKFDYIICHGVI <del>SWVPK</del> TVR | 158 |
| <i>Rickettsia typhi</i>                                     | 76  | LGCAAGGNLIPHAVLYPKAHFVGV <del>DLSKVQ</del> IDEANKNVKALGLKNIEFHHC <del>SITD</del> INDSFGKFDYIICHGVI <del>SWVPK</del> IVR | 155 |
| <i>Rickettsia prowazeki</i>                                 | 78  | LGCAAGGNLIPHAVLYPN <del>AHFVGV</del> DLSKVQIDEANKNVKALGLKNIEFHHC <del>SITD</del> IDSFGKFDYIICHGVI <del>SWVPK</del> IVR  | 157 |
| <i>Rickettsia bellii</i>                                    | 78  | LGCAAGGNLIPHAVLYPKAHFVGV <del>DLSKVQ</del> IDEANKTVKELGLKNIEFHHC <del>SITD</del> IDSFGKFDYIICHGVI <del>SWVPK</del> NVR  | 157 |
| <i>Rickettsia endosymbiont of Proechinophthirus fluctus</i> | 79  | LGCAAGGNLIPHAVLYPKAYFVGV <del>DLSKVQ</del> IDEANKNVKALGLKNIEFHHC <del>SITD</del> INDSFGKFDYIICHGVI <del>SWVPK</del> TVR | 158 |
| <i>Rickettsia parkeri</i>                                   | 159 | DKIFEVCNKNLSPNGIAYISYNTLPGWNMVRTIRDMMYHSSSFANVRDRIAQSRLLLEFVKDSLENSKTPYAEALKTEA                                         | 238 |
| <i>Rickettsia rickettsii</i>                                | 159 | DKIFEVCNKNLSPNGIAYISYNTLPGWNMVRTIRDMMYHSSSFANVRDKIAQSRLLLEFVKDSLENSKTPYAEALKTEA                                         | 238 |
| <i>Rickettsia conorii</i>                                   | 159 | DKIFEVCNKNLSPNGIAYISYNTLPGWNMVRTIRDMMYHSSSFANVRDRIAQSRLLLEFVKDSLENSKTPYAEALKTEA                                         | 238 |
| <i>Rickettsia typhi</i>                                     | 156 | DKIFEVCNKNLSTNGIAYISYNTLPGWNMVRTIRDMLYHSSSFTNVRDRIAQSRLLLEFVKDSLENSKTPYAEVLKTEA                                         | 235 |
| <i>Rickettsia prowazeki</i>                                 | 158 | DKIFEVCNKNLSTNGIAYISYNTLPGWNMVRTIRDMLYHSSSFTNIRDRIAQSRLLLEFVKDSLENSKTPYAEVLKTEA                                         | 237 |
| <i>Rickettsia bellii</i>                                    | 158 | DKIFEVCNKNLSTNGIAYISYNTLPGWNMVRTIRDMLYHSSSFTNVRDKIAQSRLLLEFVKDSLENSKTPYAEVLKTEA                                         | 237 |
| <i>Rickettsia endosymbiont of Proechinophthirus fluctus</i> | 159 | DKIFEVCNKNLSPNGIAYISYNTLPGWNMVRTIRDMMYHSSSFANVRDRIAQSRLLLEFVKDSLENSKTPYAEALKTEA                                         | 238 |
| <i>Rickettsia parkeri</i>                                   | 239 | GLLAKQTDHYLRHDHLEEEENAQFYFHEF <del>MNEAR</del> KHNLQYLADCNLSTMYLGNMPPKVVEQLKAVNDIVRTEQYMDFITNR                          | 318 |
| <i>Rickettsia rickettsii</i>                                | 239 | GLLAKQTDHYLRHDHLEEEENAQFYFHEF <del>MNEAR</del> KHNLQYLADCNLSTMYLGNMPPKVVEQLKAVNDIVRTEQYMDFITNR                          | 318 |
| <i>Rickettsia conorii</i>                                   | 239 | GLLAKQTDHYLRHDHLEEEENAQFYFHEF <del>MNEAR</del> KHNLQYLADCNLSTMYLGNMPPKVVEQLKAVNDIVRTEQYMDFITNR                          | 318 |
| <i>Rickettsia typhi</i>                                     | 236 | GLLAKQTDHYLRHDHLEEEENAQFYFHEF <del>MNEAR</del> KHNLQYLADCNLSTMYLGNMPPKVVEQLKAVNDIVRTEQYMDFITNR                          | 315 |
| <i>Rickettsia prowazeki</i>                                 | 238 | GLLAKQTDHYLRHDHLEEEENAQFYFHEF <del>MNEAR</del> KHNLQYLADCNLSTMYLGNMPPKVVEQLKAVNDIVRTEQYMDFITNR                          | 317 |
| <i>Rickettsia bellii</i>                                    | 238 | GLLAKQTDHYLRHDHLEEEENAQFYFHEF <del>MNEAR</del> KHNLQYLADCNLSTMYLGNMPPKVVEQLKAVNDIVRTEQYMDFITNR                          | 317 |
| <i>Rickettsia endosymbiont of Proechinophthirus fluctus</i> | 239 | GLLAKQTDHYLRHDHLEEEENAQFYFHEF <del>MNEAR</del> KHNLQYLADCNLSTMYLGNMPPKVVEQLKAVNDIVRTEQYMDFITNR                          | 318 |
| <i>Rickettsia parkeri</i>                                   | 319 | RFRTTLLCHSDVKINRNNDDITKFNIIFNIVPEKPLKEVDLNNASENLKFFLNGNQDSNLTTSSPYMKAILTYFSEN                                           | 398 |
| <i>Rickettsia rickettsii</i>                                | 319 | RFRTTLLCHSDVKINRNNDDITKFNIIFNIVPEKPLKEVDLNNASENLKFFLNGNQDSNLTTSSPYMKAILTYFSEN                                           | 398 |
| <i>Rickettsia conorii</i>                                   | 319 | RFRTTLLCHSDVKINRNNDDITKFNIIFNIVPEKPLKEVDLNNASENLKFFLNGNQDSNLTTSSPYMKAILTYFSEN                                           | 398 |
| <i>Rickettsia typhi</i>                                     | 316 | RFRTTLLCHNDLKINRNNDDITKFNIIFNIVPEKPLQEVLDLNAEENLQFFLNGKCNLSSTSSPYMKAILTYFSEN                                            | 395 |
| <i>Rickettsia prowazeki</i>                                 | 318 | RFRTTLLCHNDLKINRNNDDITKFNIIFNIVPEKPLKEVDLNNATENLQFFLNGKCNLSSTSSPYMKAILTYFSEN                                            | 397 |
| <i>Rickettsia bellii</i>                                    | 318 | RFRTTLLCHNDVKINRNNDDIMKFNIIFNIVPEKPLKEVDLNNSESLAFFLNGKCNLSSTSSPYMKAILTYFSEN                                             | 397 |
| <i>Rickettsia endosymbiont of Proechinophthirus fluctus</i> | 319 | RFRTTLLCHSDVKINRNNDDITKFNIIFNIVPEKPLKEVDLNNASENLKFFLNGNQDSNLTTSSPYMKAILTYFSEN                                           | 398 |
| <i>Rickettsia parkeri</i>                                   | 399 | NNPLSFEKITT <del>EANKKLHNT</del> KLMEIKAEFLNNAMKLV <del>LQGY</del> SITNQKRRNPELDPKPTTKMVIHQATHTPSMVVTNLK                | 478 |
| <i>Rickettsia rickettsii</i>                                | 399 | NNPLSFEKITT <del>EANKKLHNT</del> KLMEIKAEFLNNAMKLV <del>LQGY</del> SITNQKRRNPELDPKPTTKMVIHQATHTPSMVVTNLK                | 478 |
| <i>Rickettsia conorii</i>                                   | 399 | NNPLSFEKITT <del>EANKKLHNT</del> KLMEIKAEFLNNAMKLV <del>LQGY</del> SITNQKRRNPELDPKPTTKMVIHQATHTPSMVVTNLK                | 478 |
| <i>Rickettsia typhi</i>                                     | 396 | NNPLSFKQVTE <del>EANKKLNN</del> KLMEIKNELNNAMKLV <del>LQGY</del> SITNQKRRNPELDPKPTTKMVIHQATHTPSMVVTNLK                  | 475 |
| <i>Rickettsia prowazeki</i>                                 | 398 | NNPLSFKQVTE <del>EANKKLNN</del> KLMEIKNELNNAMKLV <del>LQGY</del> SITNQKRRNPELDPKPTTKMVIHQATHTPSMVVTNLK                  | 477 |
| <i>Rickettsia bellii</i>                                    | 398 | NNPLSFEKITT <del>EANKKLHNT</del> KLMEIKAEFLNNAMKLV <del>LQGY</del> SITNQKRRNPELDPKPTTKMVIHQATHTPSMVVTNLK                | 477 |
| <i>Rickettsia endosymbiont of Proechinophthirus fluctus</i> | 399 | NNPLSFEKITT <del>EANKKLHNT</del> KLMEIKAEFLNNAMKLV <del>LQGY</del> SITNQKRRNPELDPKPTTKMVIHQATHTPSMVVTNLK                | 478 |
| <i>Rickettsia parkeri</i>                                   | 479 | HEPIGVNPF <del>EKFALRYMDGKHDKKAI</del> IEAVLGHVEK <del>GELT</del> LSKEGQKVENKEEIRKELES <del>LFIPMIK</del> KFSSNALLV     | 554 |
| <i>Rickettsia rickettsii</i>                                | 479 | HEPIGVNPF <del>EKFALRYMDGKHDKKAI</del> IEAVLGHVEK <del>GELT</del> LSKEGQKVENKEEIRKELES <del>LFIPMIK</del> KFSSNALLV     | 554 |
| <i>Rickettsia conorii</i>                                   | 479 | HEPIGVNPF <del>EKFALRYMDGKHDKKAI</del> IEAVLGHVEK <del>GELT</del> LSKEGQKVENKEEIRKELES <del>LFIPMIK</del> KFSSNALLV     | 554 |
| <i>Rickettsia typhi</i>                                     | 476 | HEPIGVNPF <del>EKFALRYMDGKNDKAI</del> IEAILGHVEK <del>GELT</del> LSKEGQKVENKEEIRKELES <del>LFIPMIK</del> KFASNALLV      | 551 |
| <i>Rickettsia prowazeki</i>                                 | 478 | HEPIGVNPF <del>EKFALRYMDGRNDKAI</del> IEAILGHVEK <del>GELT</del> LSREGQKVENKEEIRKELES <del>LFIPMIK</del> KFCSNALLV      | 553 |
| <i>Rickettsia bellii</i>                                    | 478 | HEPVGVNPF <del>EKFALRYMDGKHDKKAI</del> IEAVLGHV <del>VEK</del> INLSKDGQKIEDQEVIRKQ <del>LEVL</del> FMPIKDFANALLV        | 553 |
| <i>Rickettsia endosymbiont of Proechinophthirus fluctus</i> | 479 | HEPIGVNPF <del>EKFALRYMDGKHDKKAI</del> IEAVLGHVEK <del>GELT</del> LSKDGQKVENKEEIRKELES <del>LFIPMIK</del> KFSSNALLV     | 554 |

359  
 360 **Figure S10. The PKMT1 enzyme is highly conserved between diverse rickettsial species.**  
 361 Amino acid sequence alignment of PKMT1 from *R. p.* (WP\_014411082.1), *R. rickettsii*  
 362 (WP\_012262600.1), *R. conorii* (WP\_016926592.1), *R. typhi* (WP\_011191207.1), *R. prowazekii*  
 363 (WP\_004596928.1), *R. bellii* (WP\_045799810.1), and a *Rickettsia* endosymbiont  
 364 (WP\_062811822.1), using COBAL. Amino acids indicated in red are identical; blue, variation  
 365 between species; grey, one or more of the analyzed proteins are lacking this residue(s).

|                              |     |                                                                                    |     |
|------------------------------|-----|------------------------------------------------------------------------------------|-----|
| <i>Rickettsia parkeri</i>    | 1   | MTKQANKISYDEVYPSPFTFSYTSPPYLRTIGKLFGLNPPPLETAKILELGCIGVNLNFAETYPKSQSLGVLDLSTQI     | 80  |
| <i>Rickettsia rickettsii</i> | 1   | MTKQANKISYDEVYPSPFTFSYTSPPYLRTIGKLFGLNPPPLETAKILELGCIGVNLNFAETYPKSQSLGVLDLSTQI     | 80  |
| <i>Rickettsia conorii</i>    | 1   | MTKQANKISYDEVYPSPFTFSYTSPPYLRTIGKLFGLNPPPLETAKILELGCIGVNLNFAETYPKSQSLGVLDLSTQI     | 80  |
| <i>Rickettsia typhi</i>      | 1   | MIKKANKISYDEVYPSPFTFSYTSPPYLRTIGKLFGLNPPPLETAKVLDIGCGIGVNLNFAETYPKSQSLGVLDLSTQI    | 80  |
| <i>Rickettsia prowazekii</i> | 1   | MIKKTNKISYDEVYPSPFTFSYTSPPYLRTIGKLFGLNPPPLETAKILDIGCGVGNLNFNAETYPKSQSLGVLDLSTQI    | 80  |
| <i>Rickettsia parkeri</i>    | 81  | ELGKKFISDLKIKNAELKALSILDDES YGKFDYIVCHGVYSWVPEEVQDKILKVCNKLNPNGIAFVSYNTLPGWNMQR    | 160 |
| <i>Rickettsia rickettsii</i> | 81  | ELGKKIISDLKIKNAELKALSILDDES YGKFDYIICHGVYSWVPEEVQDKILKVCNKLNPNGIAFVSYNTLPGWNMQS    | 160 |
| <i>Rickettsia conorii</i>    | 81  | ELGKKIISDLKIKNAELKALSILDDES YGKFDYIVCHGVYSWVPEEVQDKILKVCNKLNPNGIAFVSYNTLPGWNMQR    | 160 |
| <i>Rickettsia typhi</i>      | 81  | ELGKKTISDAKINNVELKALSILDDES YGKFDYIVCHGVYSWVQEVQDKILEVLNKLNPNGIAFVSYNTLPGWNMQN     | 160 |
| <i>Rickettsia prowazekii</i> | 81  | EIGKKTISDSKIKNVGLKALSILDDES YGKFDYIVCHGVYSWVSKEVQDKILEVLNKLNPNGIAFISYNTLPGWNMQN    | 160 |
| <i>Rickettsia parkeri</i>    | 161 | TIREMIMFHSELFNTSHDKLQQAALLKLFINDSLESSTTPYSNFLRDET KLLSAYTDSYVLHEYLGEINTGIYFHQFIEK  | 240 |
| <i>Rickettsia rickettsii</i> | 161 | TIREMIMFHSELFNTSHDKLQQAALLKLFINDSLESSTTPYSNFLRDET KLLSAYTDSYVLHEYLGEINTGIYFHQFIEK  | 240 |
| <i>Rickettsia conorii</i>    | 161 | TIREMIMFHSELFNTSHDKLQQAALLKLFINDSLESSTTPYSNFLRDET KLLSAYTDSYVLHEYLGEINTGIYFHQFIEK  | 240 |
| <i>Rickettsia typhi</i>      | 161 | TIREMMFHSESFNTSHDKLQQAALLKLFINDSLGNSTTPYANFLRDEAKLISTYDSDYVLHEYLGEINTGIYFHQFIEK    | 240 |
| <i>Rickettsia prowazekii</i> | 161 | TIREMMFHSESFNTSHDKLQQAALLKLFINDSLENSTTPYANFLREEAKLISTYADSYVLHEYLGEINTGIYFHQFIEK    | 240 |
| <i>Rickettsia parkeri</i>    | 241 | AQKNHLNLYLGDTSLTAMFIGNLPTQAAEKLQAVNDIVRTEQYMDFITNRKFRSTLLCHQNIPIINRKIEFNLLKEFFTSLN | 320 |
| <i>Rickettsia rickettsii</i> | 241 | AQKNHLNLYLGDTSLTAMFIGNLPTQAAEKLQAVNDIVRTEQYMDFITNRKFRSTLLCHQNIPIINRKIEFNLLKEFFTSLN | 320 |
| <i>Rickettsia conorii</i>    | 241 | AQKNHLNLYLGDTSLTAMFIGNLPTQAAEKLQAVNDIVRTEQYMDFITNRKFRSTLLCHQNIPIINRKIEFNLLKEFFTSLN | 320 |
| <i>Rickettsia typhi</i>      | 241 | AQKNHLNLYLGDTSIAAMFIGNLPTKAAEKLQAVNDIVCTEQYMDFITNRKFRSTLLCHQNIPIINRKIEFDNLKDFYTFN  | 320 |
| <i>Rickettsia prowazekii</i> | 241 | AQKNHLNLYLGDTSITAMFIGNLPTKAAEKLQAVNDIVRTEQYMDFITNRKFRSTLLCHQNIPIINRKIEFENLKDFYTFN  | 320 |
| <i>Rickettsia parkeri</i>    | 321 | IRPVILEKAVDLTNEQENVSFYENLPEPFIISTTSPIMKAILYVYAENISNPISLEQVAKEAFKLGKYLQDFLAALQ      | 400 |
| <i>Rickettsia rickettsii</i> | 321 | IRPVILEKAVDLTNEQENVSFYENLPEPFIISTTSPIMKAILYVYAENISNPISLEQVAKEAFKLGKYLQDFLAALQ      | 400 |
| <i>Rickettsia conorii</i>    | 321 | IRPVILEKAVDLTNEQENVSFYENLPEPFIISTTSPIMKAILYVYAENISNPISLEQVAKEAFKLGKYLQDFLAALQ      | 400 |
| <i>Rickettsia typhi</i>      | 321 | IRPISPENKIDLNNEQENISFYENLPEPFIISTTSAIMKAILYVYAENISNPISLEQVAKEAFKLGKYLQDFLATLEQ     | 400 |
| <i>Rickettsia prowazekii</i> | 321 | IRPISSENKIDLNNEQENISFYENLPEPFIISTTSAIMKAILYVYAENISNPISLEQVAKEAFKLGKYLQDFLAILEQ     | 400 |
| <i>Rickettsia parkeri</i>    | 401 | HFIIIFIQGYLKI FETKPHAATITEPKTSEFARYQAKQAYFNNVTSVFSVTNRLNNDMVGIP IHEKYILEMLDGTNID   | 480 |
| <i>Rickettsia rickettsii</i> | 401 | HFIIIFIQGYLKI FETKPHAATITEPKTSEFARYQAKQAYFNNVTSVFSVTNRLNNDMVGIP IHEKYILEMLDGTNID   | 480 |
| <i>Rickettsia conorii</i>    | 401 | HFIIIFIQGYLKI FETKPHAATITEPKTSEFARYQAKQAYFNNVTSVFSVTNRLNNDMVGIP IHEKYILEMLDGTNID   | 480 |
| <i>Rickettsia typhi</i>      | 401 | HFITLFIQGYLKI FETKPHAATITEPKTSQFARYQAKHAHFNNVTNMF SITNRLNNDMIGIP IHEKYILEMLDGTNID  | 480 |
| <i>Rickettsia prowazekii</i> | 401 | HFITFIQGYLKI FETKPHAATITEPKTSQFVRYQAKHAHFNNVTNMLSVTNRLNNDMIGIP IHEKYILEMLDGTNID    | 480 |
| <i>Rickettsia parkeri</i>    | 481 | DIKKGVLEKINSKLLTARDDKGQVETDPKLLKEFVDYVVNTSLEKFRINYLVE                              | 534 |
| <i>Rickettsia rickettsii</i> | 481 | DIKKGVLEKINSKLLTARDDKGQVETDPKLLKEFVDYAVNTSLEKFRMNYLVE                              | 534 |
| <i>Rickettsia conorii</i>    | 481 | DIKKGVLEKINSKLLTARDDKGQVETDPKLLKEFVDYVVNTSLEKFRINYLVE                              | 534 |
| <i>Rickettsia typhi</i>      | 481 | DIKKSIEKINSKLLTACDNKGQVETDPKLLKEFVDYVVAVSLEKFRINYLVG                               | 534 |
| <i>Rickettsia prowazekii</i> | 481 | DIKKGMIEKINSKLLIACDNKGQAVTDPKLLKEFVDYIVNISLEKFRINYLIG                              | 534 |

366  
367 **Figure S11. The PKMT2 enzyme is highly conserved between virulent rickettsial species**  
368 **but absent from *R. bellii* and the *Rickettsia endosymbiont Proechinophthirus fluctus*.**  
369 Amino acid sequence alignment of PKMT2 from *R. p.* ([WP\\_014410272.1](https://www.ncbi.nlm.nih.gov/nuccore/114410272)), *R. rickettsii*  
370 ([WP\\_012150259.1](https://www.ncbi.nlm.nih.gov/nuccore/12150259)), *R. conorii* ([WP\\_016925880.1](https://www.ncbi.nlm.nih.gov/nuccore/16925880)), *R. typhi* ([WP\\_011190574.1](https://www.ncbi.nlm.nih.gov/nuccore/11190574)), and *R.*  
371 *prowazekii* ([WP\\_004596662.1](https://www.ncbi.nlm.nih.gov/nuccore/4596662)) using COBALT. PKMT1 of *R. bellii* and the *Rickettsia*  
372 *endosymbiont Proechinophthirus fluctus* showed 51% identity to PKMT2 of *R. p.* using single  
373 alignment BLAST at NCBI; however, no PKMT2 variants could be found in these organisms, and  
374 therefore they were excluded from this analysis. Amino acids indicated in red are identical; blue,  
375 variation between species.

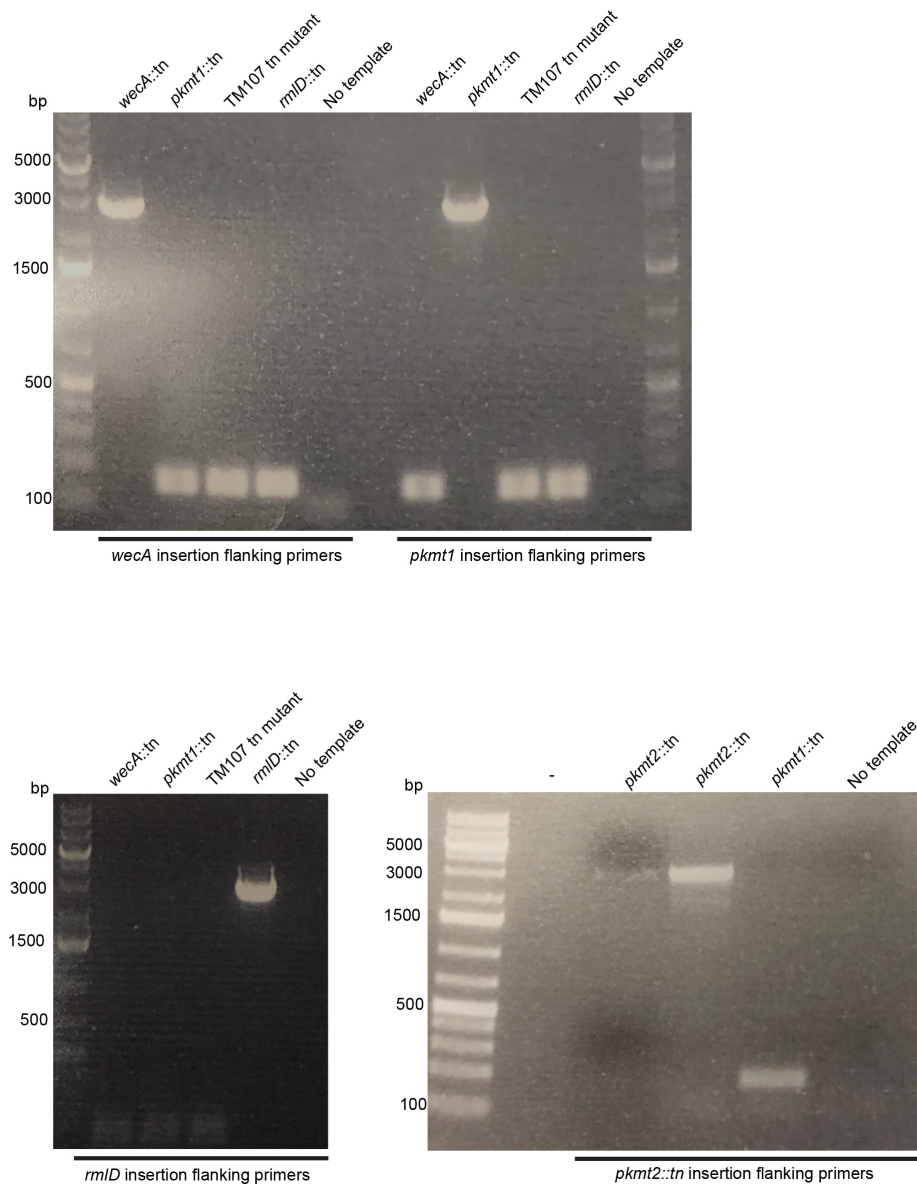

376

377

378

**Fig. S12.** Strain validation of clonality and insertion site using primers for flanking chromosomal regions ( $n = 1$ ).

## 379 **Materials and Methods**

### 380 **Cell lines and primary mouse macrophages**

381 Vero cells were purchased from the UC Berkeley Cell Culture Facility and the identity was  
382 repeatedly confirmed by mass-spectrometry analysis. Cells were grown at 37 °C and 5% CO<sub>2</sub> in  
383 DMEM plus 2% heat-inactivated (30 min, 56 °C, in a water-bath) fetal bovine serum (Gemcell).  
384 Vero cells were confirmed to be mycoplasma negative by DAPI staining and fluorescence  
385 microscopy screening at the UC Berkeley Cell Culture Facility.

386 BMDMs generated from the femurs of mutant *Atg5<sup>flox/flox</sup>* and matched *Atg5<sup>-/-</sup>* C57BL/6  
387 mice were a kind gift from the laboratory of Jeffery S. Cox (UC Berkeley), and they were prepared  
388 as previously described (11) although in the absence of antibiotics. Genotypes were confirmed  
389 by PCR and Sanger sequencing at the UC Berkeley DNA Sequencing Facility, as previously  
390 described (11).

391

### 392 ***Rickettsia parkeri* strain generation and validation**

393 *R. parkeri* strain Portsmouth (NCBI accession no. [NC\\_017044.1](#); originally a gift from C.  
394 Paddock, Center for Disease Control and Prevention) were propagated and purified as described  
395 below, and bacterial stocks of WT, *ompB<sup>STOP::tn</sup>* (the genome sequences of these bacterial strains  
396 are available at the Sequence Read Archive as accession no. [SRP154218](#) (WT, [SRX4401164](#);  
397 *ompB<sup>STOP::tn</sup>*, [SRX4401167](#)), *pkmt1::tn*, *pkmt2::tn*, *wecA::tn* and *rlmD::tn* bacteria were prepared  
398 every ~6-10 months, and side-by-side experimental comparisons were made between stocks  
399 prepared at similar times.

400 *R. parkeri* *pkmt1::tn*, *pkmt2::tn*, *wecA::tn*, and 114 other mutant strains screened for pUb  
401 were previously isolated in a screen for small plaque mutants (13, 22). The *ompB<sup>STOP::tn</sup>* was  
402 previously isolated in a suppressor screen and lacked expression of OmpB (11). The *rlmD::tn*,  
403 and 132 other mutant strains screened for pUb were isolated in an independent screen in which

404 mutants were isolated without regard for plaque size (**Table S1**). The genomic locations of  
405 transposon insertion sites for all mutants were determined by semi-random nested PCR. To verify  
406 the insertions and clonality, we used PCR reactions that amplified the transposon insertion site  
407 using primers for flanking chromosomal regions: 5'GCTCACTAGATAGCACTCG'3 and  
408 5'GCTCGATTTATCTCACTTTATG'3 for *rlmD::tn*, 5'CGTTTAATAGTCCAGTTAATTTGT'3 and  
409 5'CCGTCTATACCGTCCATAAAAT'3 for *wecA::tn*, 5'GCATCGAAATAACCCTGAG'3 and  
410 5'GCAAACCTTCTCAAAGAAATTAACG'3 for *pkmt1::tn*,  
411 5'GCTAAGAAATCTTCTAATTTGATATTTTAC'3 and 5'CGAAAATTTACCTGAGCCTT'3 for  
412 *pkmt2::tn*, 5'CGACACATAATAGCACAAACTAC'3 and 5'GCGGAGGCGGTAGTAAAG'3 for  
413 *mrdA::tn* (**Fig. S12**).

414

#### 415 **Screening for pUb-positive strains**

416 To prepare the mutant library for screening, passage 1 (P1) transposon insertion mutants  
417 were amplified one time in Vero cells using 24-well cell culture plates. At 5-12 d.p.i, when 50-70%  
418 of the infected cells appeared to be rounded up (as a sign of infection) by visual inspection using  
419 a light microscope, cell culture media were completely removed, and cells were subsequently  
420 lysed in 500  $\mu$ L cold sterile water for 2-3 minutes (min). Next, 500  $\mu$ L of 2x cold sterile brain-heart-  
421 infusion (BHI) broth (BD Difco, cat. no. 237500) was added to the lysed cells, resuspended, and  
422 P2 bacteria were transferred to cryogenic storage vials and frozen at -80 °C.

423 To screen for pUb-positive strains, 10-40  $\mu$ L of each of five to seven P2 mutant bacterial  
424 strains were diluted in 1 mL of room temperature (RT) cell culture media supplemented with 2%  
425 FBS. Subsequently, the pooled bacterial suspension was centrifuged at 250g for 4 min at RT onto  
426 confluent Vero cells grown on coverslips in 24-well plates. Cells were then incubated at 33 °C and  
427 fixed at 50-55 h.p.i. with pre-warmed 4% PFA for 10 min at RT. If cells were over-infected (i.e.,  
428 individual infection foci had grown together) as determined by immunofluorescence microscopy,

429 infections of that specific pool were repeated using reduced volumes of P2 bacteria. Next, fixed  
430 cells were permeabilized with 0.2% Triton-X for 5 min and then stained with the anti-*Rickettsia*  
431 I7205 antibody (1:500 dilution; gift from Ted Hackstadt) and anti-polyubiquitin FK1 antibody (Enzo  
432 Life Sciences, BML-PW8805-0500; 1:250 dilution), followed by Alexa 488 anti-rabbit antibody  
433 (Invitrogen, A11008; 1:500 dilution) or goat anti-mouse Alexa-568 (Invitrogen, A11004). Whole  
434 coverslips were manually inspected on a Nikon Ti Eclipse microscope with x60 (1.4 numerical  
435 aperture) Plan Apo objective. The initial screen revealed that five out of 39 mutant pools contained  
436 pUb-positive areas.

437         In a secondary screen, individual strains from the pUb-positive pools were used to infect  
438 Vero cells, as stated above. Infected cells were also fixed and stained as above except that a  
439 post-fixation step using 100% methanol for 5 min was included and that an OmpB antibody (11)  
440 and Hoechst (Sigma, B2261, 1:2500 dilution) was used instead of the anti-*Rickettsia* I7205  
441 antibody. Samples were inspected as above and strains were scored as following: **1)** pUb-  
442 negative (49 strains), **2)** a few infection foci were pUb-positive (2 strains: Sp mutant 24, insertion  
443 at bp position 753916; Sp mutant 94, insertion at bp position 774831), **3)** bacteria in the center of  
444 foci were pUb-positive but not on the edges (2 strains: Sp mutant 43, insertion at bp position  
445 651602-651604; Sp mutant 45, insertion at bp position 751156), **4)** almost all bacteria in all foci  
446 were pUb-positive (4 strains: *pkmt1::tn*, insertion at bp position 1161553 (gene *MC1\_RS06185*);  
447 *pkmt2::tn*, insertion at bp position 34100 (gene *MC1\_RS00180*); *wecA::tn*, insertion at bp position  
448 1223170 (*MC1\_RS06510*); and *rmID::tn*, insertion at bp position 455753 (*MC1\_RS02345*).

449

#### 450 ***Rickettsia* purification**

451         *R. parkeri* strains were propagated as described previously (11). “Purified bacteria” were  
452 from five T175 flasks of Vero cells growing in DMEM supplemented with 2% FBS that after 5-8  
453 days of infection (normally ~75% infected as observed by light microscopy) were harvested in the



454 media using a cell scraper. Then, bacteria were centrifuged 12000g for 15 min at 4 °C in pre-  
455 chilled tubes. Pellets were resuspended in cold K-36 buffer (0.05 M KH<sub>2</sub>PO<sub>4</sub>, 0.05 M K<sub>2</sub>HPO<sub>4</sub>, pH  
456 7, 100 mM KCl and 15 mM NaCl) and a pre-chilled dounce-homogenizer (tight fit) were used for  
457 60 strokes to release bacteria from host cells. The homogenate was then centrifuged at 200g for  
458 5 min at 4 °C to remove cellular debris. The supernatant was overlaid onto cold 30% v/v MD-76R  
459 (Mallinckrodt Inc., 1317-07) diluted in K-36, and centrifuged at 58300g for 20 min at 4 °C in an  
460 SW-28 swinging-bucket rotor. The pellet was resuspended in cold 1x BHI broth (0.5 mL BHI per  
461 infected T175 flask), and after letting DNA precipitates sediment to the bottom of the tubes,  
462 bacterial suspensions were collected, aliquoted and frozen at -80 °C.

463 “Gradient-purified bacteria” were from ten T175 flasks of Vero cells, purified as above with  
464 the addition of a 40/44/54% v/v MD-76R (diluted in K-36 buffer) gradient step centrifuged at  
465 58300g for 25 min at 4 °C using the SW-28 swinging bucket rotor. The bacteria were then  
466 collected from the 44-54% interface, diluted in K-36 buffer, and pelleted by centrifugation at  
467 12000g for 15 min at 4 °C. The pellet was resuspended in cold 1x BHI broth and subsequently  
468 aliquoted and frozen at -80 °C.

469

#### 470 **OmpW and EF-Tu antibody production**

471 The sequence encoding amino acids 22-224 of outer membrane protein W (OmpW;  
472 WP\_014411122.1) (a protein that lacks the signal peptide), or full-length Elongation factor Tu (EF-  
473 Tu; WP\_004997779.1), were amplified by PCR from *R. parkeri* genomic DNA, and subsequently  
474 cloned into plasmid pETM1, which encodes N-terminal 6xHis and maltose-binding proteins (MBP)  
475 tags. From the resulting plasmids, fusion proteins were expressed in *E. coli* strain BL21 codon  
476 plus RIL-Cam<sup>r</sup> (DE3) (QB3 Macrolab, UC Berkeley) by induction with 1 mM isopropyl-β-D-thio-  
477 galactoside (IPTG) for 2-2.5 hours at 37 °C. Bacterial pellets were resuspended in lysis buffer (50  
478 mM NaH<sub>2</sub>PO<sub>4</sub>, pH 8.0, 300 mM NaCl, 1mM EDTA, and 1 mM dithiothreitol (DTT)) and stored at -

479 80 °C. For protein purification, bacteria were thawed, lysozyme was added to 1 mg/mL (Sigma,  
480 L4919), and lysis was carried out by sonication. Lysates containing 6xHis-MBP-OmpW and 6xHis-  
481 MBP-OmpW were incubated on amylose resin (New England Biolabs, E8021L) (Qiagen,  
482 1018244) and bound proteins were eluted in lysis buffer lacking EDTA and DTT but containing 10  
483 mM maltose. Fractions were analyzed by SDS-PAGE and those with the highest concentrations  
484 of fusion proteins were pooled to generate rabbit antibodies against OmpW and EFTU. 1.2 mg of  
485 purified 6xHis-MBP-OmpW and 6xHis-MBP-EFTU proteins were sent to Pocono Rabbit Farm and  
486 Laboratory (Canadensis, PA), and immunization was carried out according to their 91-d protocol.  
487

#### 488 **Western blotting**

489 To determine the levels of bacterial and host proteins in purified bacterial samples, 30%-  
490 purified bacterial samples were boiled in 1x SDS loading buffer (150 mM Tris pH 6.8, 6% SDS,  
491 0.3% bromophenol blue, 30% glycerol, 15%  $\beta$ -mercaptoethanol) for 10 min, then  $1 \times 10^6$  PFUs  
492 were resolved on an 8-12% SDS-PAGE gel and transferred to an Immobilon-FL polyvinylidene  
493 difluoride membrane (Millipore, IPEL00010). Membranes were probed for 30 min at room  
494 temperature or 4°C overnight with antibodies as follows: affinity-purified rabbit anti-OmpB  
495 antibody (11) diluted 1:200-30000 in TBS-T (20 mM Tris, 150 mM NaCl, pH 8.0, 0.05% Tween 20  
496 (Sigma, P9416)) plus 5% dry milk (Apex, 20-241); mouse monoclonal anti-OmpA 13-3 antibody  
497 diluted 1:10000-50000 in TBS-T plus 5% dry milk; rabbit anti-OmpW serum diluted 1:8000 in TBS-  
498 T plus 5% dry milk; mouse monoclonal FK1 anti-polyubiquitin antibody diluted 1:2500 in TBS-T  
499 plus 2% BSA; rabbit anti-OmpW serum diluted 1:15000 in TBS-T plus 5% dry milk; or rabbit anti-  
500 O-antigen serum 1:5000 in TBS-T plus 5% dry milk. Secondary antibodies were: mouse anti-  
501 rabbit horseradish peroxidase (HRP) (Santa Cruz Biotechnology, sc-2357), or goat anti-mouse  
502 HRP (Santa Cruz Biotechnology, sc-2005), diluted 1:1000-2500 in TBS-T plus 5% dry milk.  
503 Secondary antibodies were detected with ECL Western Blotting Detection Reagents (GE,

504 Healthcare, RPN2106) for 1 min at room temperature, and developed using Biomax Light Film  
505 (Carestream, 178-8207).

506

### 507 **Immunofluorescence microscopy**

508 *R. parkeri* infections were carried out in 24-well plates with sterile circle 12-mm coverslips  
509 (Thermo Fisher Scientific, 12-545-80). To initiate infection, 30%-purified bacteria were diluted in  
510 cell culture media at room temperature to a MOI of 0.01 for Vero cells, and a MOI of 0.1 for  
511 BMDMs. Bacteria were centrifuged onto cells at 300g for 5 min at room temperature and  
512 subsequently incubated at 33 °C. Next, infected cells were fixed for 10 min at room temperature  
513 in pre-warmed (37 °C) 4% paraformaldehyde (Ted Pella Inc., 18505) diluted in PBS, pH 7.4, then  
514 washed 3 times with PBS. Primary antibodies were the following: for staining with the guinea pig  
515 polyclonal anti-p62 antibody (Fitzgerald, 20R-PP001; 1:500 dilution), mouse polyclonal anti-  
516 NDP52 antibody (Novus Biologicals, H00010241-B01P; 1:100 dilution), a rabbit anti-*Rickettsia*  
517 I7205 antibody (1:500 dilution; gift from Ted Hackstadt), or anti-polyubiquitin FK1 antibody (1:250  
518 dilution), cells were permeabilized with 0.5% Triton-X100 for 5 min prior to staining. For staining  
519 with mouse monoclonal anti-OmpA 13-3 antibody (1:5000 dilution), anti-OmpB antibody (11)  
520 (1:1,000 dilution), or rabbit anti-O-antigen serum (15) (1:500 dilution), infected cells were post-  
521 fixed in methanol for 5 min at RT (no Triton-X). Cells were then washed 3 x with PBS and  
522 incubated with the primary antibody diluted as already indicated in PBS with 2% BSA for 30 min  
523 at RT. To detect the primary antibodies, secondary goat anti-rabbit Alexa-568 (Invitrogen,  
524 A11036), goat anti-mouse Alexa-568 (Invitrogen, A11004), or goat anti-guinea pig Alexa-568  
525 (Invitrogen, A11075), Alexa 488 anti-rabbit antibody (Invitrogen, A11008; 1:500 dilution), Alexa  
526 488 anti-mouse antibody (Invitrogen, A11001) antibodies were incubated at room temperature for  
527 30 min (all 1:500 in PBS with 2% BSA). Images were captured as 15-25 z-stacks (0.1- $\mu$ m step  
528 size) on a Nikon Ti Eclipse microscope with a Yokogawa CSU-XI spinning disc confocal with 100X

529 (1.4 NA) Plan Apo objectives, and a Clara Interline CCD Camera (Andor Technology) using  
530 MetaMorph software (Molecular Devices). Images were processed using ImageJ using z-stack  
531 average maximum intensity projections and assembled in Adobe Photoshop. For quantification  
532 of the percentage of bacteria with pUb and p62, only bacteria that co-localized with rim-like  
533 patterns of the respective marker were scored as positive for staining. To quantify pUb, p62,  
534 NDP52, OmpB, and OmpA signal per bacteria, z-stacks were projected as stated above, and the  
535 edges of individual bacteria were marked by the freehand region of interest (ROI) function in  
536 ImageJ. Subsequently, the average pixel intensity within that ROI was measured.  
537 pUb/p62/NDP52 signal intensities were calculated by subtracting the average pUb/p62/NDP52  
538 signal of WT bacteria from the pUb/p62/NDP52-value of each bacterium. OmpB signal intensity  
539 was calculated by subtracting the average OmpB-signal of *ompB<sup>STOP</sup>::tn* bacteria from the OmpB-  
540 value of each bacterium. OmpA signal intensity was calculated by subtracting the average  
541 background-signal (areas with no bacteria) from the OmpA-value of each bacterium.

542

#### 543 **Sample preparation for mass spectrometry to determine the lysine methylome**

544  $5 \times 10^7$  gradient-purified WT (Passage 6), *pkmt1::tn* (P4) and *pkmt2::tn* (P4) bacteria were  
545 centrifuged at 11,000g for 3 min. Each pellet was resuspended in 50  $\mu$ L Tris (10 mM)-EDTA (10  
546 mM), pH 7.6, and incubated for 45 min in a 45 °C water bath. Bacterial surface fractions were  
547 recovered from the supernatant after centrifugation at 11,000g for 3 min. Pellet was resuspended  
548 as above and incubated for additional 45 min at 45 °C before resuspension in 50  $\mu$ L Tris (10 mM)-  
549 EDTA (10 mM). Both pellet and surface fractions were boiled at 95 °C for 10 min. Samples were  
550 cooled to RT prior to addition of 20  $\mu$ L 50 mM  $\text{NH}_4\text{HCO}_3$ , pH 7.5, and 50  $\mu$ L of a 0.2% solution of  
551 RapiGest (diluted in  $\text{NH}_4\text{HCO}_3$ , Waters, 186001861). Next, samples were heated at 80 °C for 15  
552 min and cooled to RT before addition of 1  $\mu$ g of trypsin (Promega, V511A). Samples were digested  
553 at 37 °C overnight. To hydrolyze the RapiGest, 20  $\mu$ L of 5% trifluoroacetic acid (TFA) was added

554 to samples which were incubated at 37 °C for 90 min prior centrifugation at 15000g for 25 min at  
555 4 °C. Supernatant samples were desalted using C18 OMIX tips (Agilent Technologies,  
556 A57003100) according to the manufacturer's instructions and sample volume was decreased to  
557 20 µL using a SpeedVac vacuum concentrator. Samples were stored at 4 °C prior to analysis.

558

### 559 **TUBE assay and sample preparation for mass spectrometry**

560 To enrich for polyubiquitylated proteins, 3x10<sup>8</sup> PFUs of "purified" WT (P6) and *pkmt1::tn*  
561 (P4) and *pkmt2::tn* (P3) bacteria were centrifuged at 14,000g for 3 min at room temperature. Next,  
562 to release the surface protein fraction, the bacterial pellets were resuspended in lysis buffer (50  
563 mM Tris-HCl, pH 7.5, 150 mM NaCl, 1 mM EDTA and 10% glycerol), supplemented with 0.0031%  
564 v/v lysonase (Millipore, 71230), the deubiquitylase inhibitor PR619 at a final concentration of 20  
565 µM (Life Sensor, SI9619) and 0.8% w/v octyl β-D-glucopyranoside (Sigma, O8001), and  
566 incubated on ice for 10 min with occasional pipetting of samples to break pellet into smaller pieces.  
567 Subsequently, the lysate was cleared by centrifugation at 14,000g at 4 °C for 5 min and incubated  
568 with equilibrated agarose TUBE-1 (Life Sensor, UM401) for 3 h, at 4 °C. After binding of  
569 polyubiquitylated proteins to TUBE-1, agarose beads were washed 1 time with TBS  
570 supplemented with 0.05% Tween and 5 mM EDTA, and subsequently 3 times with TBS only (no  
571 Tween or EDTA) and centrifuged at 5,000g for 5 min. To prepare samples for MS analysis,  
572 enriched proteins were digested at 37 °C overnight on agarose beads in RapiGest SF solution  
573 (Waters, 186001861) supplemented with 0.75 µg trypsin (Promega, V511A). The reaction was  
574 stopped using 1% TFA (Sigma, T6508). Octyl β-D-glucopyranoside was extracted using water-  
575 saturated ethyl acetate. Prior to submission of samples for mass spectrometry analysis, samples  
576 were desalted using C18 OMIX tips (Agilent Technologies, A57003100), according to the  
577 manufacturer's instructions.

578

## 579 **Liquid chromatography-mass spectrometry**

580 Samples of proteolytically digested proteins were analyzed using a Synapt G2-Si ion  
581 mobility mass spectrometer that was equipped with a nanoelectrospray ionization source  
582 (Waters). The mass spectrometer was connected in line with an Acquity M-class ultra-  
583 performance liquid chromatography system that was equipped with trapping (Symmetry C18,  
584 inner diameter: 180  $\mu\text{m}$ , length: 20 mm, particle size: 5  $\mu\text{m}$ ) and analytical (HSS T3, inner  
585 diameter: 75  $\mu\text{m}$ , length: 250 mm, particle size: 1.8  $\mu\text{m}$ ) columns (Waters). Data-independent, ion  
586 mobility-enabled, high-definition mass spectra and tandem mass spectra were acquired in the  
587 positive ion mode (23-25). Data acquisition was controlled using MassLynx software (version 4.1),  
588 and tryptic peptide identification and relative quantification using a label-free approach (26, 27)  
589 were performed using Progenesis Q1 for Proteomics software (version 4.0, Waters). Raw data  
590 were searched against *Rickettsia parkeri* and *Chlorocebus sabaesus* protein databases (National  
591 Center for Biotechnology Information, NCBI) to identify tryptic peptides, allowing for up to three  
592 missed proteolytic cleavages, with diglycine-modified lysine (i.e., ubiquitylation remnant) and  
593 methylated lysine as variable post-translational modifications. Data-dependent analysis was  
594 performed using an UltiMate3000 RSLCnano liquid chromatography system that was connected  
595 in line with an LTQ-Orbitrap-XL mass spectrometer equipped with a nanoelectrospray ionization  
596 source, and Xcalibur (version 2.0.7) and Proteome Discoverer (version 1.3, Thermo Fisher  
597 Scientific, Waltham, MA) software, as described elsewhere (28).

598

## 599 **Localization of tagged ubiquitin and ubiquitin pull-downs**

600 To assess localization of 6xHis-ubiquitin during infection, confluent Vero cells grown in 24-  
601 well plates with coverslips were transfected with 2  $\mu\text{g}$  of pCS2-6xHis-ubiquitin plasmid DNA using  
602 Lipofectamine 2000 (Invitrogen, 11668-019) for 6 h in Opti-MEM (Gibco, 31985-070).  
603 Subsequently, media was exchanged to media without transfection reagent and cells were

604 incubated overnight at 37 °C and 5% CO<sub>2</sub>. The following day (~16 h after transfection), transfected  
605 cells were infected with purified WT or mutant bacteria at a MOI of 1. At 28 h.p.i., infected cells  
606 were fixed with 4% paraformaldehyde (Ted Pella Inc., 18505) diluted in PBS, pH 7.4 for 10 min,  
607 then washed 3 times with PBS. Primary anti-6xHis monoclonal mouse antibody (Clontech,  
608 631212, diluted 1:1,000) was used to detect 6xHis-ubiquitin in samples permeabilized with 0.5%  
609 Triton-X100, and a goat anti-mouse Alexa-568 (Invitrogen, A11004) to detect the primary 6xHis  
610 antibody. Hoechst (Thermo Scientific, 62249, diluted 1:2500) was used to detect bacterial DNA.  
611 Samples were imaged as already described.

612 For ubiquitin pull-downs, confluent Vero cells grown in 6-well plates were transfected and  
613 infected as described above. At 28 h.p.i., cells were washed once with 1x PBS, pH 7.4, and  
614 subsequently lysed in urea lysis buffer (8 M urea, 50 mM Tris-HCl, pH 8.0, 300 mM NaCl, 50 mM  
615 Na<sub>2</sub>HPO<sub>4</sub>, 0.5% Igepal CA-630 (Sigma, I8896)) for 20 min at RT. Subsequently, samples were  
616 sonicated, and lysate was cleared by centrifugation at 15000g for 15 min at room temperature.  
617 Prior to incubation with Ni-NTA resin, an aliquot was saved for the input sample. 6xHis-ubiquitin  
618 conjugates were purified by incubation and rotation with Ni-NTA resin for 3 h, at RT, in the  
619 presence of 10 mM imidazole. Beads were washed 3 times with urea lysis buffer and 1 time with  
620 urea lysis buffer lacking Igepal CA-630. Ubiquitin conjugates were eluted at 65 °C for 15 min in  
621 2x Laemmli buffer containing 200 mM imidazole and 5% 2-mercaptoethanol (Sigma, M6250),  
622 vortexed for 90 seconds, and centrifuged at 5000g for 5 min at RT. Eluted and input proteins were  
623 detected by SDS-PAGE followed by Western blotting, as described above.

624

## 625 **Animal experiments**

626 Animal research using mice was conducted under a protocol approved by the UC Berkeley  
627 Institutional Animal Care and Use Committee (IACUC) in compliance with the Animal Welfare Act.  
628 The UC Berkeley IACUC is fully accredited by the Association for the Assessment and

629 Accreditation of Laboratory Animal Care International and adheres to the principles of the Guide  
630 for the Care and Use of Laboratory Animals. Infections were performed in a biosafety level 2  
631 facility. Mice were age-matched between 8 and 18 weeks old. Mice were selected for experiments  
632 based on their availability, regardless of sex. All mice were healthy at the time of infection and  
633 were housed in microisolator cages and provided chow and water. Littermates of the same sex  
634 were randomly assigned to experimental groups. For infections, *R. parkeri* was prepared by  
635 diluting 30%-prep bacteria into cold sterile 1x PBS to  $5 \times 10^6$  PFU per 200  $\mu$ L. Bacterial  
636 suspensions were kept on ice during injections. Mice were exposed to a heat lamp while in their  
637 cages for approximately 5 min and then each mouse was moved to a mouse restrainer (Braintree,  
638 TB-150 STD). The tail was sterilized with 70% ethanol, and 200  $\mu$ L of bacterial suspensions were  
639 injected using 30.5-gauge needles into the lateral tail vein. Body temperatures were monitored  
640 using a rodent rectal thermometer (BrainTree Scientific, RET-3). Mice were monitored daily for  
641 clinical signs of disease, such as hunched posture, lethargy, or scruffed fur. If a mouse displayed  
642 severe signs of infection, as defined by a reduction in body temperature below 90 °F or an inability  
643 to move around the cage normally, the animal was immediately and humanely euthanized using  
644 CO<sub>2</sub> followed by cervical dislocation, according to IACUC-approved procedures (16).

645

#### 646 **Statistical analysis, experimental variability and reproducibility**

647 Statistical parameters and significance are reported in the legends. Data were considered  
648 to be statistically significant when  $p < 0.05$ , as determined by a one-way ANOVA with Dunnett's  
649 post-hoc test, a Kruskal-Wallis test with Dunn's post-hoc test, a Brown-Forsyth and Welch  
650 ANOVA with Dunnett's post-hoc test, or a two-way ANOVA (all two-sided). Statistical analysis  
651 was performed using PRISM 6 software (GraphPad Software). If not otherwise described,  $n$   
652 indicates the number of independent biological experiments executed at different times.
